# Supplementary material for: Revisiting the electron transfer pathways between amicyanin and cytochrome c from a theoretical perspective
Source: Royal Society of Chemistry journal article supplement (doi:10.1039/d4cp04465g), 2024-12-26
Supplement: d4cp04465g1.pdf [file d4cp04465g1.pdf]

## Revisiting the electron transfer between amicyanin and cytochrome c from a theoretical perspective

Archan Ravi Sankar<sup>[a]</sup>, Manasa Bhat<sup>[b]</sup>, Kaustab Ghosh<sup>[c]</sup>, Ramachandran Gnanasekaran<sup>[a]\*</sup>

[a] Department of Chemistry, School of Advanced Sciences, Vellore Institute of Technology, Chennai, India.

[b] Department of Physics, School of Advanced Sciences, Vellore Institute of Technology, Chennai, India

[c] School of Electronics Engineering, Vellore Institute of Technology, Chennai, India

\*Corresponding author e-mail address: [ramachandran.g@vit.ac.in](mailto:ramachandran.g@vit.ac.in)

### Supplementary Documents

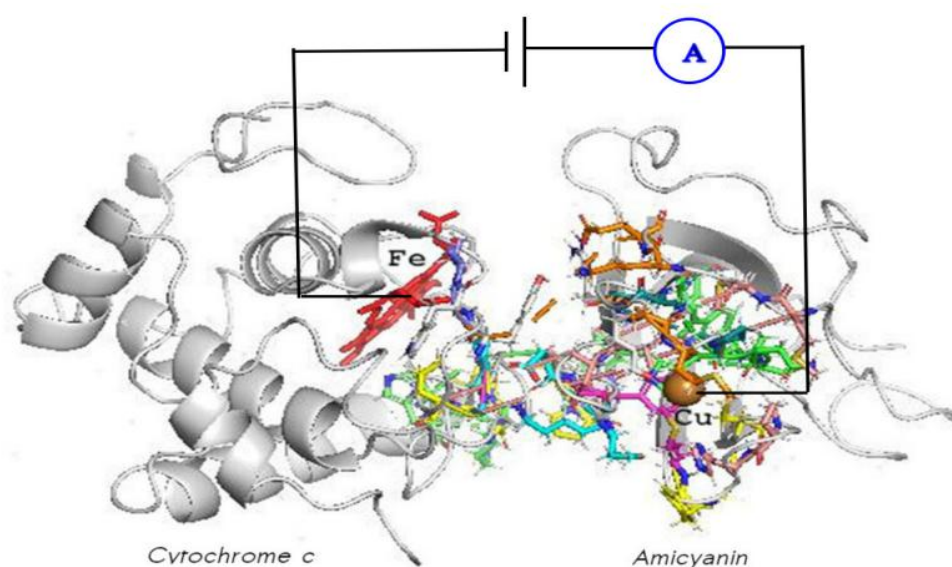

**Figure S1.** Collection of all the ET(ET1-ET10) pathways between the Cytochrome c and amicyanin and were given in the picture.

Geometric coordinates which are considered for each pathways from ET1-ET10 are given below.

#### Geometry of Pathway ET1

|   |           |          |          |
|---|-----------|----------|----------|
| N | -13.10723 | 0.13269  | -0.92119 |
| C | -13.71837 | -0.63248 | 0.09194  |
| C | -12.73598 | -1.20504 | 1.11291  |
| O | -13.01587 | -2.26990 | 1.58812  |
| C | -14.63205 | -1.82502 | -0.37233 |
| C | -15.68127 | -1.38775 | -1.34718 |
| S | -17.29888 | -0.60459 | -0.68914 |
| C | -18.06955 | -0.32454 | -2.31559 |
| H | -13.43361 | 1.06872  | -0.97255 |
| H | -14.23710 | 0.09586  | 0.69629  |
| H | -13.98384 | -2.63350 | -0.78351 |
| H | -15.13821 | -2.25479 | 0.50408  |
| H | -15.27389 | -0.74147 | -2.14571 |
| H | -16.17616 | -2.23563 | -1.86736 |
| H | -19.00872 | 0.25246  | -2.21802 |

|    |           |          |          |
|----|-----------|----------|----------|
| H  | -17.44970 | 0.29182  | -3.00027 |
| H  | -18.28308 | -1.30179 | -2.80107 |
| N  | -11.68899 | -0.48758 | 1.41961  |
| C  | -10.64315 | -1.10906 | 2.26542  |
| C  | -9.70465  | 0.01096  | 2.70471  |
| O  | -9.65537  | 1.12693  | 2.21219  |
| C  | -9.80833  | -2.19000 | 1.56175  |
| C  | -8.89269  | -1.77433 | 0.45680  |
| C  | -8.29494  | -3.09276 | -0.18134 |
| C  | -6.81164  | -2.93687 | -0.48862 |
| N  | -6.50304  | -2.02370 | -1.60356 |
| H  | -11.43029 | 0.35681  | 0.96291  |
| H  | -11.18268 | -1.38400 | 3.15958  |
| H  | -9.20227  | -2.70062 | 2.34919  |
| H  | -10.48006 | -3.01100 | 1.22406  |
| H  | -9.43159  | -1.23731 | -0.34452 |
| H  | -8.08127  | -1.10545 | 0.80650  |
| H  | -8.49133  | -3.88124 | 0.57518  |
| H  | -8.87101  | -3.27129 | -1.10398 |
| H  | -6.32237  | -2.47426 | 0.39575  |
| H  | -6.51123  | -3.91972 | -0.91142 |
| H  | -6.36590  | -1.03812 | -1.30622 |
| H  | -5.59403  | -2.16998 | -2.07270 |
| H  | -7.25579  | -2.02903 | -2.32401 |
| N  | -5.62272  | 0.48575  | 2.90529  |
| C  | -4.45166  | 0.03531  | 2.24664  |
| C  | -3.53117  | -0.78678 | 3.14190  |
| O  | -3.04876  | -1.87430 | 2.72348  |
| C  | -3.65474  | 1.25042  | 1.64098  |
| C  | -4.37114  | 1.92003  | 0.47060  |
| C  | -4.75721  | 0.85016  | -0.62982 |
| O  | -3.89314  | 0.51062  | -1.47516 |
| O  | -5.83499  | 0.27894  | -0.59118 |
| H  | -5.68536  | 1.47914  | 2.87747  |
| H  | -4.79441  | -0.72353 | 1.55117  |
| H  | -3.38113  | 1.97044  | 2.43244  |
| H  | -2.71762  | 0.77089  | 1.28652  |
| H  | -5.31654  | 2.45768  | 0.70821  |
| H  | -3.72536  | 2.58212  | -0.15295 |
| N  | 1.03096   | -1.62217 | 1.27903  |
| C  | -0.33255  | -1.65724 | 0.77443  |
| C  | -0.75241  | -2.95870 | 0.06442  |
| O  | 0.10840   | -3.67707 | -0.42909 |
| C  | -0.36869  | -0.46286 | -0.16256 |
| C  | 0.59240   | 0.59641  | 0.44346  |
| C  | 1.69369   | -0.39017 | 0.89923  |
| H  | -1.00306  | -1.47694 | 1.59790  |
| H  | -0.01986  | -0.71127 | -1.18798 |
| H  | -1.39280  | -0.03431 | -0.17475 |
| H  | 0.85465   | 1.42016  | -0.26595 |
| H  | 0.28981   | 1.07958  | 1.38982  |
| H  | 2.34728   | -0.71254 | 0.05507  |
| H  | 2.38346   | 0.07678  | 1.63806  |
| N  | -2.03718  | -3.25995 | 0.01836  |
| C  | -2.77702  | -4.26801 | -0.68054 |
| C  | -3.09312  | -3.90158 | -2.05401 |
| O  | -4.23802  | -3.54278 | -2.34395 |
| H  | -2.47551  | -2.57463 | 0.59134  |
| H  | -2.26400  | -5.21110 | -0.79138 |
| H  | -3.74874  | -4.27349 | -0.20543 |
| Cu | -16.80855 | 5.20568  | 0.82407  |
| C  | 5.43517   | 1.97071  | -4.08777 |
| C  | 9.99440   | -5.61982 | -0.09156 |
| C  | 11.05470  | 0.39573  | 5.01784  |

|    |           |          |          |
|----|-----------|----------|----------|
| C  | 6.85233   | 5.10693  | 0.28403  |
| N  | 7.71677   | 0.14529  | -1.74166 |
| C  | 4.05273   | 1.55230  | -3.58272 |
| C  | 10.01559  | -6.69093 | -0.81577 |
| C  | 11.64894  | -0.06131 | 6.13828  |
| C  | 7.11159   | 5.70504  | -1.15014 |
| N  | 8.81348   | -2.11618 | -0.51188 |
| C  | 2.79200   | 2.36887  | -3.98767 |
| C  | 7.83263   | 7.07911  | -0.99188 |
| N  | 8.24995   | 1.62549  | 0.56312  |
| C  | 6.93119   | 2.42801  | -1.25933 |
| C  | 7.87938   | -1.98171 | -2.73061 |
| C  | 9.92109   | -2.94802 | 1.53002  |
| C  | 9.59825   | 1.70373  | 2.64011  |
| C  | 6.71550   | -0.56110 | -5.23650 |
| C  | 8.68290   | -4.82435 | -2.88679 |
| C  | 10.89753  | -2.65757 | 4.35846  |
| C  | 8.54179   | 4.58366  | 2.89692  |
| C  | 6.99765   | 1.27771  | -2.08090 |
| C  | 8.51750   | -2.66347 | -1.70279 |
| C  | 9.98125   | -1.70891 | 2.20366  |
| C  | 8.76654   | 2.25416  | 1.70102  |
| O  | 2.42163   | 2.43264  | -5.13298 |
| O  | 8.94855   | 7.09767  | -1.52974 |
| C  | 6.49220   | 1.13818  | -3.43074 |
| C  | 8.86194   | -4.01418 | -1.71860 |
| C  | 10.58060  | -1.54356 | 3.48781  |
| C  | 8.32461   | 3.57340  | 1.81933  |
| O  | 2.21776   | 2.95782  | -3.03794 |
| O  | 7.22830   | 8.03925  | -0.46900 |
| C  | 6.96714   | -0.01417 | -3.90056 |
| C  | 9.47119   | -4.40109 | -0.55065 |
| C  | 10.63519  | -0.27215 | 3.88609  |
| C  | 7.49642   | 3.81262  | 0.69441  |
| C  | 7.62300   | -0.62533 | -2.76785 |
| C  | 9.41608   | -3.15305 | 0.19464  |
| C  | 9.97604   | 0.36065  | 2.69933  |
| C  | 7.51792   | 2.58115  | -0.01631 |
| N  | 9.54948   | -0.51421 | 1.70904  |
| Fe | 8.56917   | -0.21183 | -0.01042 |
| H  | -12.10239 | 0.15244  | -0.74688 |
| H  | -9.05745  | -0.19139 | 3.48278  |
| H  | -6.44026  | 0.08693  | 2.44369  |
| H  | -3.30263  | -0.45274 | 4.09151  |
| H  | -3.06645  | 0.95043  | -1.50320 |
| H  | 1.01258   | -1.69093 | 2.29671  |
| H  | -2.36286  | -3.94189 | -2.78179 |
| H  | 5.60038   | 3.00256  | -3.85559 |
| H  | 5.48128   | 1.82649  | -5.14650 |
| H  | 10.37873  | -5.66252 | 0.86522  |
| H  | 10.88530  | 1.41368  | 5.00432  |
| H  | 5.79523   | 4.96497  | 0.37167  |
| H  | 7.31272   | 5.82243  | 0.93242  |
| H  | 3.89219   | 0.54997  | -3.91995 |
| H  | 4.11914   | 1.71378  | -2.52671 |
| H  | 9.63724   | -6.67245 | -1.77595 |
| H  | 10.41136  | -7.56419 | -0.43378 |
| H  | 11.85623  | -1.06745 | 6.23877  |
| H  | 11.89578  | 0.59478  | 6.89616  |
| H  | 7.72896   | 5.03634  | -1.71350 |
| H  | 6.18285   | 5.83632  | -1.66551 |
| H  | 6.39335   | 3.22983  | -1.62315 |
| H  | 7.56853   | -2.54009 | -3.54114 |
| H  | 10.26812  | -3.77788 | 2.03615  |

|   |          |          |          |
|---|----------|----------|----------|
| H | 9.97717  | 2.33425  | 3.36454  |
| H | 6.20351  | 0.16742  | -5.83013 |
| H | 6.11275  | -1.44148 | -5.15366 |
| H | 7.64674  | -0.80929 | -5.70115 |
| H | 8.17567  | -4.25719 | -3.63967 |
| H | 8.10059  | -5.68683 | -2.63706 |
| H | 9.63842  | -5.13372 | -3.25659 |
| H | 11.33768 | -2.29007 | 5.26234  |
| H | 11.58760 | -3.31054 | 3.86489  |
| H | 10.00202 | -3.19464 | 4.59118  |
| H | 8.04465  | 5.49474  | 2.63745  |
| H | 9.58985  | 4.76845  | 3.00700  |
| H | 8.14726  | 4.21177  | 3.81912  |
| H | 2.88808  | 1.97247  | -5.80239 |
| H | 9.30663  | 6.31156  | -1.89154 |

### Geometry of Pathway ET2

|   |           |          |          |
|---|-----------|----------|----------|
| N | -9.11219  | -0.87918 | -0.21757 |
| C | -8.06118  | -0.78144 | 0.74629  |
| C | -6.70672  | -0.90789 | -0.01024 |
| O | -6.59178  | -1.76729 | -0.91535 |
| C | -8.26468  | -1.77711 | 1.84271  |
| C | -9.53274  | -1.58801 | 2.62940  |
| C | -9.63382  | -0.49146 | 3.54267  |
| C | -10.75565 | -2.34385 | 2.48080  |
| C | -10.81388 | -0.17728 | 4.17216  |
| C | -11.87382 | -2.05468 | 3.14411  |
| C | -11.88463 | -0.98867 | 3.95830  |
| O | -13.14317 | -0.74891 | 4.62904  |
| H | -9.28180  | -1.84065 | -0.39370 |
| H | -8.09582  | 0.13643  | 1.32302  |
| H | -8.35075  | -2.82635 | 1.49019  |
| H | -7.41781  | -1.71369 | 2.55747  |
| H | -8.87334  | 0.26091  | 3.70699  |
| H | -10.78009 | -3.19094 | 1.81026  |
| H | -10.98930 | 0.55973  | 4.93776  |
| H | -12.80859 | -2.54906 | 2.91003  |
| H | -13.10459 | 0.09986  | 5.07982  |
| N | -5.74177  | -0.00732 | 0.29168  |
| C | -4.44401  | -0.10515 | -0.26898 |
| C | -3.70619  | -1.37847 | 0.12962  |
| O | -3.11081  | -2.06413 | -0.74553 |
| C | -3.57793  | 1.15166  | 0.11665  |
| C | -4.05335  | 2.44078  | -0.54935 |
| C | -4.16337  | 2.24853  | -2.11637 |
| O | -3.12986  | 2.37842  | -2.81743 |
| O | -5.20564  | 1.86854  | -2.62497 |
| H | -5.82990  | 0.81936  | 0.83970  |
| H | -4.60730  | -0.28399 | -1.32651 |
| H | -3.50114  | 1.25027  | 1.21395  |
| H | -2.57185  | 0.87709  | -0.26573 |
| H | -5.04481  | 2.83082  | -0.22658 |
| H | -3.31291  | 3.27480  | -0.53040 |
| N | 2.44505   | -4.50824 | 0.68583  |
| C | 2.21718   | -3.05742 | 0.54981  |
| C | 1.10996   | -2.63695 | -0.31816 |
| O | 0.19090   | -3.39947 | -0.53099 |
| H | 2.34482   | -5.03457 | -0.15869 |
| H | 2.07490   | -2.62846 | 1.53543  |
| H | 3.15467   | -2.71786 | 0.15586  |
| N | 1.17106   | -1.42168 | -0.96204 |
| C | -0.05360  | -1.02538 | -1.63891 |

|    |           |          |          |
|----|-----------|----------|----------|
| C  | -0.27124  | -1.62774 | -3.04033 |
| O  | 0.69746   | -2.00785 | -3.68665 |
| C  | 0.06908   | 0.48746  | -1.68456 |
| C  | 0.84540   | 0.90113  | -0.40425 |
| C  | 1.85790   | -0.26876 | -0.41400 |
| H  | -0.88814  | -1.29043 | -1.01162 |
| H  | 0.63414   | 0.84551  | -2.57192 |
| H  | -0.94305  | 0.94132  | -1.63747 |
| H  | 1.22390   | 1.95309  | -0.43104 |
| H  | 0.33444   | 0.77443  | 0.56707  |
| H  | 2.68495   | -0.10516 | -1.14401 |
| H  | 2.36072   | -0.38520 | 0.57257  |
| N  | -1.50680  | -1.71993 | -3.49683 |
| C  | -2.04909  | -2.05994 | -4.77836 |
| C  | -2.08063  | -0.93787 | -5.70602 |
| O  | -3.14994  | -0.36806 | -5.94157 |
| H  | -2.07839  | -1.45370 | -2.72709 |
| H  | -1.49339  | -2.80955 | -5.32074 |
| H  | -3.09838  | -2.24460 | -4.59155 |
| N  | -15.81697 | -4.02977 | -0.56873 |
| C  | -14.48765 | -3.59873 | -0.19280 |
| C  | -14.04830 | -4.29427 | 1.11426  |
| O  | -14.80278 | -4.11714 | 2.07586  |
| C  | -14.50994 | -2.11277 | 0.24936  |
| C  | -14.86882 | -1.14062 | -0.88797 |
| S  | -15.02402 | 0.56328  | -0.24248 |
| C  | -13.41705 | 0.86350  | 0.49841  |
| H  | -16.63842 | -3.48140 | -0.36896 |
| H  | -13.81158 | -3.78915 | -1.01486 |
| H  | -15.23321 | -2.01775 | 1.09313  |
| H  | -13.46919 | -1.87352 | 0.57387  |
| H  | -14.08351 | -1.18194 | -1.66955 |
| H  | -15.83167 | -1.31448 | -1.41901 |
| H  | -12.61473 | 0.55493  | -0.20448 |
| H  | -13.22197 | 1.92200  | 0.76474  |
| H  | -13.24687 | 0.20016  | 1.37569  |
| Cu | -16.38757 | 6.10851  | -0.70615 |
| C  | 6.48612   | 4.16375  | -2.25114 |
| C  | 10.34903  | -4.73928 | -2.68288 |
| C  | 10.10983  | -2.92659 | 5.06786  |
| C  | 6.84601   | 4.03655  | 3.29965  |
| N  | 8.28117   | 1.10600  | -1.03866 |
| C  | 5.04288   | 3.66737  | -2.36051 |
| C  | 10.55769  | -5.18983 | -3.87689 |
| C  | 10.46941  | -4.00276 | 5.79583  |
| C  | 7.38174   | 5.32534  | 2.56901  |
| N  | 9.16818   | -1.54369 | -1.18605 |
| C  | 3.86952   | 4.68571  | -2.44054 |
| C  | 8.00749   | 6.27634  | 3.63533  |
| N  | 8.26761   | 0.91952  | 1.74565  |
| C  | 7.33668   | 2.75216  | 0.52938  |
| C  | 8.71862   | -0.06029 | -3.03289 |
| C  | 9.84755   | -3.50645 | 0.14591  |
| C  | 9.14469   | -0.34995 | 3.68396  |
| C  | 8.06260   | 2.65318  | -4.39631 |
| C  | 9.63040   | -2.35031 | -4.66845 |
| C  | 10.19600  | -5.00256 | 2.73012  |
| C  | 7.96335   | 1.93670  | 5.37268  |
| C  | 7.61268   | 2.28938  | -0.77916 |
| C  | 9.14800   | -1.26915 | -2.50120 |
| C  | 9.72349   | -2.89851 | 1.41391  |
| C  | 8.51180   | 0.72007  | 3.10854  |
| O  | 3.74687   | 5.43599  | -3.37598 |
| O  | 9.21044   | 6.49384  | 3.43408  |

|    |           |          |          |
|----|-----------|----------|----------|
| C  | 7.40787   | 3.00648  | -2.02046 |
| C  | 9.53244   | -2.38742 | -3.23942 |
| C  | 10.03303  | -3.56584 | 2.63639  |
| C  | 8.01157   | 1.76306  | 3.89061  |
| O  | 3.08894   | 4.66919  | -1.45615 |
| O  | 7.27519   | 6.81030  | 4.49505  |
| C  | 8.00891   | 2.29878  | -2.97550 |
| C  | 9.89437   | -3.43575 | -2.43010 |
| C  | 9.96048   | -2.77190 | 3.70526  |
| C  | 7.43154   | 2.68822  | 2.98714  |
| C  | 8.43120   | 1.08469  | -2.31644 |
| C  | 9.64229   | -2.85080 | -1.12228 |
| C  | 9.54565   | -1.50870 | 3.01566  |
| C  | 7.64295   | 2.09995  | 1.70990  |
| N  | 9.36643   | -1.60279 | 1.64197  |
| Fe | 8.76097   | -0.26774 | 0.27813  |
| H  | -8.83281  | -0.41389 | -1.08117 |
| H  | -3.69401  | -1.67955 | 1.11694  |
| H  | -2.33080  | 2.67031  | -2.42507 |
| H  | 1.77637   | -4.87054 | 1.36523  |
| H  | -1.21250  | -0.62062 | -6.16457 |
| H  | -15.79853 | -4.15545 | -1.58122 |
| H  | -13.98903 | -5.34653 | 0.92759  |
| H  | -13.10852 | -3.85917 | 1.38521  |
| H  | -15.67362 | -4.49704 | 1.87807  |
| H  | 6.56454   | 4.84898  | -1.43247 |
| H  | 6.75899   | 4.65492  | -3.16115 |
| H  | 10.52435  | -5.36478 | -1.88102 |
| H  | 9.91357   | -2.07788 | 5.62129  |
| H  | 5.79946   | 3.97383  | 3.08500  |
| H  | 7.13558   | 4.19607  | 4.31700  |
| H  | 4.99017   | 3.06634  | -3.24377 |
| H  | 4.87993   | 3.18078  | -1.42119 |
| H  | 10.38974  | -4.58256 | -4.69448 |
| H  | 10.89270  | -6.15657 | -4.01227 |
| H  | 10.68397  | -4.89591 | 5.32505  |
| H  | 10.52923  | -3.93389 | 6.82415  |
| H  | 8.12568   | 5.04955  | 1.85056  |
| H  | 6.57862   | 5.82023  | 2.06358  |
| H  | 6.86139   | 3.66437  | 0.61027  |
| H  | 8.60412   | -0.01334 | -4.05762 |
| H  | 10.10736  | -4.50510 | 0.12453  |
| H  | 9.34144   | -0.29531 | 4.69601  |
| H  | 7.66341   | 3.63646  | -4.53454 |
| H  | 7.48532   | 1.95099  | -4.96104 |
| H  | 9.07851   | 2.63029  | -4.73114 |
| H  | 9.27474   | -1.40607 | -5.02578 |
| H  | 9.03734   | -3.13655 | -5.08731 |
| H  | 10.65207  | -2.47999 | -4.95977 |
| H  | 10.42345  | -5.27069 | 3.74114  |
| H  | 10.99575  | -5.31304 | 2.08966  |
| H  | 9.28978   | -5.48491 | 2.42903  |
| H  | 7.50224   | 2.87306  | 5.60751  |
| H  | 8.95801   | 1.92059  | 5.76649  |
| H  | 7.39587   | 1.14046  | 5.80671  |
| H  | 4.35883   | 5.40514  | -4.08450 |
| H  | 9.66247   | 6.03164  | 2.75649  |

### Geometry of Pathway ET3

|   |          |          |          |
|---|----------|----------|----------|
| N | -7.00389 | -1.29352 | -0.06627 |
| C | -5.95226 | -1.27440 | -1.03422 |
| C | -4.60065 | -1.17653 | -0.26841 |
| O | -4.50904 | -0.39822 | 0.70977  |

|   |           |          |          |
|---|-----------|----------|----------|
| C | -6.18659  | -0.19135 | -2.03770 |
| C | -7.45008  | -0.34639 | -2.83906 |
| C | -7.52098  | -1.35969 | -3.84649 |
| C | -8.69414  | 0.35733  | -2.62462 |
| C | -8.69258  | -1.65071 | -4.50235 |
| C | -9.80466  | 0.09603  | -3.31190 |
| C | -9.78603  | -0.89307 | -4.21785 |
| O | -11.03831 | -1.10860 | -4.90823 |
| H | -7.20101  | -0.35691 | 0.19471  |
| H | -5.96131  | -2.13785 | -1.69047 |
| H | -6.30243  | 0.81937  | -1.59314 |
| H | -5.33955  | -0.16618 | -2.75463 |
| H | -6.73928  | -2.07199 | -4.07662 |
| H | -8.74192  | 1.14024  | -1.88128 |
| H | -8.84794  | -2.32136 | -5.33071 |
| H | -10.75296 | 0.54020  | -3.03539 |
| H | -10.97594 | -1.91235 | -5.43283 |
| N | -1.62976  | -0.06176 | -1.56809 |
| C | -1.00011  | 1.27940  | -1.88279 |
| C | -2.08629  | 2.31043  | -2.21683 |
| O | -2.73475  | 2.16635  | -3.23827 |
| C | -0.07175  | 1.30934  | -3.08651 |
| C | 0.94154   | 2.46725  | -3.13430 |
| O | 0.60572   | 0.09278  | -3.12413 |
| H | -2.02521  | -0.66668 | -2.25350 |
| H | -0.47253  | 1.55924  | -0.97430 |
| H | -0.64726  | 1.45277  | -4.03788 |
| H | 0.87919   | -0.03078 | -4.03366 |
| H | 0.53873   | 3.48017  | -2.92091 |
| H | 1.78481   | 2.33320  | -2.41749 |
| H | 1.36478   | 2.50050  | -4.15820 |
| N | -2.39842  | 3.45581  | -1.48534 |
| C | -3.70827  | 4.07088  | -1.60363 |
| C | -3.69555  | 5.07853  | -2.69477 |
| O | -4.81674  | 5.35692  | -3.18503 |
| C | -3.76822  | 4.91781  | -0.32676 |
| C | -2.29015  | 5.01448  | 0.15531  |
| C | -1.76365  | 3.66169  | -0.18373 |
| H | -4.45324  | 3.30739  | -1.67970 |
| H | -4.36241  | 5.85941  | -0.25368 |
| H | -4.19253  | 4.39962  | 0.55456  |
| H | -1.86120  | 5.75511  | -0.55749 |
| H | -2.16930  | 5.32735  | 1.21474  |
| H | -0.65020  | 3.59263  | -0.24902 |
| H | -2.16502  | 2.93409  | 0.55680  |
| N | -0.14372  | 3.16983  | 4.47412  |
| C | 0.10705   | 3.06270  | 3.07122  |
| C | 0.37639   | 4.43776  | 2.54012  |
| O | -0.27934  | 5.39357  | 2.92722  |
| H | 0.62801   | 3.25600  | 5.10103  |
| H | 0.95046   | 2.40087  | 2.95788  |
| H | -0.72903  | 2.61481  | 2.56272  |
| N | 1.39484   | 4.55715  | 1.66622  |
| C | 1.70459   | 5.76072  | 1.01324  |
| C | 2.48768   | 5.44956  | -0.26082 |
| O | 1.85499   | 5.21697  | -1.27803 |
| C | 2.39604   | 6.78810  | 1.91617  |
| C | 2.43128   | 8.18808  | 1.36101  |
| C | 3.10963   | 9.26075  | 2.33861  |
| C | 2.97079   | 10.71631 | 1.82229  |
| N | 3.86073   | 11.08921 | 0.63277  |
| H | 1.93100   | 3.75637  | 1.42254  |
| H | 0.76729   | 6.22096  | 0.73421  |
| H | 1.80484   | 6.90363  | 2.84979  |

|   |          |          |          |
|---|----------|----------|----------|
| H | 3.37394  | 6.34007  | 2.22840  |
| H | 3.00477  | 8.18052  | 0.41235  |
| H | 1.45869  | 8.58435  | 1.01013  |
| H | 2.62904  | 9.26024  | 3.33928  |
| H | 4.16575  | 8.97658  | 2.52500  |
| H | 1.95294  | 10.97211 | 1.46699  |
| H | 3.26424  | 11.46968 | 2.58989  |
| H | 3.52761  | 10.60261 | -0.22061 |
| H | 3.93689  | 12.08541 | 0.34178  |
| H | 4.83585  | 10.76354 | 0.74975  |
| N | 3.83773  | 5.30718  | -0.26018 |
| C | 4.55709  | 5.00951  | -1.58174 |
| C | 4.48659  | 3.47623  | -1.76879 |
| O | 4.44562  | 2.95533  | -2.93977 |
| C | 6.04816  | 5.25904  | -1.56643 |
| C | 6.24727  | 6.70751  | -1.22232 |
| C | 6.59009  | 4.95504  | -2.99699 |
| C | 7.72257  | 7.15214  | -1.25046 |
| H | 4.38332  | 5.52408  | 0.54100  |
| H | 3.98172  | 5.46549  | -2.37718 |
| H | 6.59183  | 4.56093  | -0.89616 |
| H | 5.79983  | 7.29335  | -2.04730 |
| H | 5.62865  | 7.02840  | -0.35783 |
| H | 7.67236  | 5.15772  | -3.07591 |
| H | 6.39370  | 3.97409  | -3.49834 |
| H | 6.04534  | 5.58216  | -3.73017 |
| H | 8.20139  | 6.49069  | -0.49329 |
| H | 8.24477  | 7.07960  | -2.23298 |
| H | 7.91469  | 8.21858  | -1.00124 |
| N | 4.44147  | 2.73606  | -0.63401 |
| C | 4.25605  | 1.27289  | -0.62798 |
| C | 3.16311  | 0.74474  | 0.19824  |
| O | 2.22270  | 1.45823  | 0.47747  |
| H | 4.32756  | 3.18193  | 0.25398  |
| H | 4.12447  | 0.92949  | -1.64801 |
| H | 5.20373  | 0.92697  | -0.26516 |
| N | 3.26064  | -0.52077 | 0.73130  |
| C | 2.04925  | -1.01124 | 1.36924  |
| C | 1.81680  | -0.54271 | 2.81860  |
| O | 2.77525  | -0.19369 | 3.49695  |
| C | 2.21587  | -2.51791 | 1.28000  |
| C | 3.00151  | -2.79312 | -0.03150 |
| C | 3.97965  | -1.59981 | 0.08322  |
| H | 1.20621  | -0.71572 | 0.76744  |
| H | 2.79272  | -2.93702 | 2.13234  |
| H | 1.21726  | -2.99501 | 1.19189  |
| H | 3.41043  | -3.83184 | -0.09827 |
| H | 2.48529  | -2.59530 | -0.98805 |
| H | 4.81244  | -1.80369 | 0.79637  |
| H | 4.47705  | -1.38138 | -0.88867 |
| N | 0.57993  | -0.52752 | 3.28058  |
| C | 0.03036  | -0.31895 | 4.58690  |
| C | 0.03311  | -1.51965 | 5.41085  |
| O | -1.01878 | -2.13903 | 5.59389  |
| H | 0.01489  | -0.74062 | 2.48975  |
| H | 0.56507  | 0.39519  | 5.19434  |
| H | -1.02419 | -0.14897 | 4.41650  |
| N | 1.16926  | -1.92492 | 5.95660  |
| C | 1.26722  | -3.05844 | 6.83820  |
| C | 0.69070  | -2.84213 | 8.26499  |
| O | 1.42139  | -2.43913 | 9.22012  |
| C | 2.68827  | -3.53338 | 7.13340  |
| C | 3.53373  | -3.86747 | 5.92704  |
| C | 2.79237  | -4.73721 | 4.89160  |



|    |           |          |          |
|----|-----------|----------|----------|
| C  | 4.32166   | -2.76607 | 5.25393  |
| H  | 2.05356   | -1.58257 | 5.63767  |
| H  | 0.71380   | -3.93377 | 6.54488  |
| H  | 3.28001   | -2.75576 | 7.65074  |
| H  | 2.62467   | -4.48645 | 7.71245  |
| H  | 4.29144   | -4.52311 | 6.40423  |
| H  | 3.51028   | -5.04692 | 4.10338  |
| H  | 2.31651   | -5.55379 | 5.46680  |
| H  | 1.99122   | -4.06819 | 4.50178  |
| H  | 4.88139   | -3.17545 | 4.38860  |
| H  | 3.69834   | -1.91165 | 4.88866  |
| H  | 5.11465   | -2.31666 | 5.88385  |
| N  | -14.23937 | 0.39274  | -4.39499 |
| C  | -14.76071 | -0.98605 | -4.49109 |
| C  | -16.28778 | -0.99070 | -4.56753 |
| O  | -16.98657 | -0.49441 | -3.70567 |
| C  | -14.27754 | -1.89648 | -3.28616 |
| S  | -14.35713 | -3.69091 | -3.65519 |
| H  | -14.23001 | 0.62702  | -3.42931 |
| H  | -14.30751 | -1.33538 | -5.40485 |
| H  | -13.21419 | -1.62475 | -3.12639 |
| H  | -14.88411 | -1.61996 | -2.40201 |
| H  | -13.67299 | -4.01527 | -2.56829 |
| N  | -16.39139 | 2.64308  | 0.78289  |
| C  | -15.44181 | 3.18735  | 1.74968  |
| C  | -14.07479 | 2.68803  | 1.38194  |
| O  | -13.13525 | 3.36638  | 1.78755  |
| C  | -15.87082 | 2.82342  | 3.25171  |
| C  | -16.03005 | 1.35140  | 3.54223  |
| C  | -17.29017 | 0.93848  | 4.06967  |
| C  | -15.01960 | 0.36839  | 3.53254  |
| C  | -17.51514 | -0.38416 | 4.53925  |
| C  | -15.24234 | -0.92868 | 3.89059  |
| C  | -16.46197 | -1.35682 | 4.37410  |
| H  | -17.03253 | 1.94450  | 1.11018  |
| H  | -15.51194 | 4.23510  | 1.52227  |
| H  | -15.26056 | 3.30583  | 4.04781  |
| H  | -16.88680 | 3.27034  | 3.34191  |
| H  | -18.11607 | 1.61598  | 4.16184  |
| H  | -14.01264 | 0.65691  | 3.26110  |
| H  | -18.47928 | -0.64731 | 4.96888  |
| H  | -14.38870 | -1.58796 | 3.86321  |
| H  | -16.53427 | -2.29780 | 4.88403  |
| N  | -13.79663 | 1.61698  | 0.55922  |
| C  | -12.45605 | 1.25998  | 0.14737  |
| C  | -12.03949 | 2.08168  | -1.09218 |
| O  | -12.79028 | 1.96907  | -2.06631 |
| C  | -12.43602 | -0.18070 | -0.42546 |
| C  | -12.76444 | -1.26033 | 0.62044  |
| S  | -12.87130 | -2.90373 | -0.17443 |
| C  | -11.25767 | -3.08990 | -0.93793 |
| H  | -14.60218 | 1.06494  | 0.31076  |
| H  | -11.78428 | 1.39598  | 0.98363  |
| H  | -13.15778 | -0.22115 | -1.27489 |
| H  | -11.38936 | -0.35972 | -0.76922 |
| H  | -11.97921 | -1.26599 | 1.40319  |
| H  | -13.73094 | -1.16254 | 1.16414  |
| H  | -10.46334 | -2.82199 | -0.20973 |
| H  | -11.03243 | -4.11434 | -1.29737 |
| H  | -11.10843 | -2.34637 | -1.75248 |
| Cu | -14.07247 | -8.50550 | -0.20777 |
| C  | 8.73794   | -6.04193 | 1.52154  |
| C  | 12.34161  | 2.89575  | 2.74782  |
| C  | 12.14083  | 1.77463  | -5.13379 |

|    |           |          |          |
|----|-----------|----------|----------|
| C  | 9.08376   | -5.41029 | -3.99555 |
| N  | 10.44125  | -2.83744 | 0.58771  |
| C  | 7.28111   | -5.59944 | 1.67363  |
| C  | 12.53930  | 3.24400  | 3.97739  |
| C  | 12.46769  | 2.92139  | -5.76269 |
| C  | 9.65801   | -6.74292 | -3.38227 |
| N  | 11.25125  | -0.18675 | 0.97130  |
| C  | 6.13795   | -6.65455 | 1.66171  |
| C  | 10.30914  | -7.57655 | -4.52862 |
| N  | 10.41715  | -2.40410 | -2.16891 |
| C  | 9.54204   | -4.36410 | -1.12149 |
| C  | 10.84834  | -1.84123 | 2.67827  |
| C  | 11.87091  | 1.90580  | -0.17995 |
| C  | 11.25344  | -0.94202 | -3.98573 |
| C  | 10.27387  | -4.68331 | 3.79397  |
| C  | 11.69628  | 0.31950  | 4.51207  |
| C  | 12.17102  | 3.63569  | -2.62030 |
| C  | 10.13585  | -3.10249 | -5.87239 |
| C  | 9.80691   | -4.01192 | 0.22329  |
| C  | 11.24147  | -0.57784 | 2.25674  |
| C  | 11.76220  | 1.40990  | -1.49717 |
| C  | 10.65294  | -2.07700 | -3.50843 |
| O  | 6.03886   | -7.48843 | 2.52648  |
| O  | 11.51826  | -7.77604 | -4.34665 |
| C  | 9.62529   | -4.84241 | 1.39559  |
| C  | 11.59465  | 0.48092  | 3.09196  |
| C  | 12.04999  | 2.19221  | -2.65509 |
| C  | 10.18174  | -3.06027 | -4.38070 |
| O  | 5.35540   | -6.57309 | 0.68212  |
| O  | 9.59106   | -8.05285 | -5.43306 |
| C  | 10.20730  | -4.20544 | 2.41035  |
| C  | 11.92450  | 1.60726  | 2.37954  |
| C  | 11.99855  | 1.49489  | -3.79051 |
| C  | 9.63049   | -4.07871 | -3.56370 |
| C  | 10.59295  | -2.92570 | 1.86242  |
| C  | 11.68710  | 1.13408  | 1.02461  |
| C  | 11.62182  | 0.16375  | -3.21653 |
| C  | 9.82708   | -3.60068 | -2.23896 |
| N  | 11.44249  | 0.12982  | -1.84005 |
| Fe | 10.87855  | -1.33847 | -0.60106 |
| H  | -6.70953  | -1.82558 | 0.75265  |
| H  | -3.79022  | -1.74474 | -0.56230 |
| H  | -0.90213  | -0.60617 | -1.10527 |
| H  | -2.82397  | 5.51930  | -3.02743 |
| H  | -0.65945  | 2.33417  | 4.74937  |
| H  | -0.30907  | -3.03066 | 8.43873  |
| H  | -14.84476 | 1.03391  | -4.90616 |
| H  | -16.74277 | -1.43173 | -5.38170 |
| H  | -16.94393 | 3.42266  | 0.42455  |
| H  | -12.01044 | 3.11441  | -0.81244 |
| H  | -11.08798 | 1.69997  | -1.40012 |
| H  | -13.67141 | 2.30437  | -1.83610 |
| H  | 8.83471   | -6.64893 | 0.64513  |
| H  | 9.02663   | -6.60409 | 2.38436  |
| H  | 12.49722  | 3.59504  | 2.00502  |
| H  | 11.96827  | 0.97326  | -5.76080 |
| H  | 8.03622   | -5.39739 | -3.77696 |
| H  | 9.37596   | -5.47004 | -5.02286 |
| H  | 7.21261   | -5.08129 | 2.60690  |
| H  | 7.10238   | -5.03605 | 0.78128  |
| H  | 12.39056  | 2.56168  | 4.73748  |
| H  | 12.84636  | 4.20417  | 4.19862  |
| H  | 12.65710  | 3.77489  | -5.21404 |
| H  | 12.52758  | 2.94618  | -6.79302 |

|   |          |          |          |
|---|----------|----------|----------|
| H | 10.39496 | -6.51073 | -2.64154 |
| H | 8.87053  | -7.30402 | -2.92355 |
| H | 9.09329  | -5.27890 | -1.28370 |
| H | 10.73714 | -1.98261 | 3.69465  |
| H | 12.10166 | 2.90570  | -0.06947 |
| H | 11.44983 | -0.90053 | -4.99847 |
| H | 9.90364  | -5.68618 | 3.84373  |
| H | 9.67749  | -4.05130 | 4.41859  |
| H | 11.28930 | -4.66081 | 4.13027  |
| H | 11.36883 | -0.66277 | 4.78357  |
| H | 11.08142 | 1.04772  | 4.99888  |
| H | 12.71429 | 0.45236  | 4.81455  |
| H | 12.38873 | 3.99933  | -3.60323 |
| H | 12.96260 | 3.91100  | -1.95412 |
| H | 11.25174 | 4.06275  | -2.27810 |
| H | 9.70169  | -4.02722 | -6.19006 |
| H | 11.12890 | -3.02246 | -6.26245 |
| H | 9.54470  | -2.28759 | -6.23415 |
| H | 6.65096  | -7.50305 | 3.23538  |
| H | 11.95793 | -7.36310 | -3.63023 |

#### Geometry of Pathway ET4

|   |          |          |          |
|---|----------|----------|----------|
| N | -3.26110 | 2.18990  | -0.44252 |
| C | -4.24263 | 1.17011  | -0.38053 |
| C | -4.45550 | 0.54697  | -1.78427 |
| O | -4.91032 | 1.27412  | -2.62765 |
| C | -5.67312 | 1.58149  | 0.21735  |
| C | -5.57200 | 2.67850  | 1.36214  |
| C | -6.34516 | 0.31111  | 0.94419  |
| C | -6.83329 | 3.24308  | 1.95840  |
| H | -3.52383 | 2.99276  | -0.97692 |
| H | -3.87999 | 0.35414  | 0.21343  |
| H | -6.27588 | 1.92930  | -0.65277 |
| H | -4.88202 | 2.28026  | 2.12858  |
| H | -4.94528 | 3.51422  | 0.97163  |
| H | -7.28774 | 0.51203  | 1.49162  |
| H | -6.42565 | -0.43259 | 0.11459  |
| H | -5.65890 | -0.03368 | 1.74709  |
| H | -6.59536 | 3.78592  | 2.89275  |
| H | -7.40808 | 3.88629  | 1.26422  |
| H | -7.51656 | 2.41888  | 2.28512  |
| N | -4.16459 | -0.76352 | -2.04693 |
| C | -4.58422 | -1.41843 | -3.35933 |
| C | -4.55056 | -2.89555 | -3.09954 |
| O | -3.88373 | -3.39933 | -2.19996 |
| C | -3.54560 | -1.18536 | -4.50295 |
| H | -3.97353 | -1.37052 | -1.28035 |
| H | -5.61187 | -1.13396 | -3.54912 |
| H | -3.85019 | -1.74562 | -5.40485 |
| H | -3.57409 | -0.09136 | -4.70801 |
| H | -2.50177 | -1.43373 | -4.20812 |
| N | -5.58993 | -4.81099 | 0.29607  |
| C | -4.63680 | -4.72704 | 1.42740  |
| C | -4.12777 | -3.28932 | 1.47259  |
| O | -4.24960 | -2.46703 | 0.57850  |
| C | -3.42491 | -5.66474 | 1.31543  |
| C | -2.41996 | -5.40288 | 0.24137  |
| C | -1.38707 | -6.60104 | 0.25985  |
| C | 0.04087  | -6.10501 | 0.07587  |
| N | 0.35196  | -5.60059 | -1.27357 |
| H | -5.45471 | -4.14882 | -0.43313 |
| H | -5.27538 | -4.82134 | 2.29316  |
| H | -2.90107 | -5.64278 | 2.30195  |

|   |           |          |          |
|---|-----------|----------|----------|
| H | -3.77928  | -6.71908 | 1.26980  |
| H | -2.88396  | -5.38534 | -0.76128 |
| H | -1.89872  | -4.43401 | 0.37444  |
| H | -1.54391  | -7.08777 | 1.24528  |
| H | -1.68131  | -7.26789 | -0.56703 |
| H | 0.19112   | -5.22923 | 0.74364  |
| H | 0.66223   | -7.02521 | 0.12220  |
| H | 0.17030   | -4.58449 | -1.38826 |
| H | 1.34944   | -5.60918 | -1.54334 |
| H | -0.19676  | -6.09893 | -2.00586 |
| N | -15.59714 | 7.62668  | 1.03873  |
| C | -15.04988 | 6.76361  | 0.04489  |
| C | -14.22129 | 7.54903  | -0.92873 |
| O | -14.67123 | 8.50036  | -1.54625 |
| C | -16.16350 | 5.91671  | -0.67284 |
| C | -16.98419 | 4.95426  | 0.18812  |
| S | -16.06271 | 3.67791  | 0.86657  |
| C | -17.40865 | 2.99510  | 1.88942  |
| H | -16.51901 | 8.01625  | 0.97168  |
| H | -14.44749 | 6.03705  | 0.55689  |
| H | -16.91538 | 6.54785  | -1.19183 |
| H | -15.75173 | 5.42349  | -1.58633 |
| H | -17.33973 | 5.56167  | 1.04417  |
| H | -17.83064 | 4.59988  | -0.43450 |
| H | -17.87789 | 3.81657  | 2.46951  |
| H | -18.22121 | 2.51233  | 1.30762  |
| H | -17.06599 | 2.15072  | 2.52574  |
| N | 4.51059   | -4.70230 | 1.17630  |
| C | 4.21858   | -6.07111 | 0.87120  |
| C | 4.13390   | -6.33674 | -0.55809 |
| O | 3.02946   | -6.48546 | -1.08883 |
| H | 3.79988   | -4.03400 | 1.37217  |
| H | 4.96136   | -6.77834 | 1.20736  |
| H | 3.19839   | -6.21370 | 1.20119  |
| N | -12.90563 | 7.16524  | -1.03574 |
| C | -11.90233 | 7.64238  | -1.92366 |
| C | -11.94559 | 7.10391  | -3.34647 |
| O | -11.82561 | 5.89307  | -3.45997 |
| C | -10.46630 | 7.54322  | -1.49496 |
| C | -10.30003 | 8.13981  | -0.06253 |
| S | -8.52403  | 8.02717  | 0.40409  |
| C | -8.70715  | 6.29824  | 1.18369  |
| H | -12.52697 | 6.47192  | -0.44167 |
| H | -12.11429 | 8.70073  | -2.01013 |
| H | -10.21088 | 6.45718  | -1.40186 |
| H | -9.64020  | 7.97559  | -2.10218 |
| H | -10.57883 | 9.20848  | -0.10512 |
| H | -10.96627 | 7.66033  | 0.68761  |
| H | -8.56409  | 5.44286  | 0.48845  |
| H | -7.88180  | 6.16853  | 1.91312  |
| H | -9.66526  | 6.27044  | 1.75216  |
| N | 5.24964   | -6.41990 | -1.26598 |
| C | 5.27853   | -6.74280 | -2.66834 |
| C | 4.98058   | -8.22820 | -3.01432 |
| O | 5.91202   | -9.08196 | -3.12429 |
| C | 6.61927   | -6.51293 | -3.36238 |
| C | 7.19167   | -5.12025 | -3.24198 |
| C | 6.15330   | -4.01408 | -3.51835 |
| C | 8.04993   | -4.77937 | -2.04440 |
| H | 6.12022   | -6.07740 | -0.91147 |
| H | 4.53767   | -6.25733 | -3.27985 |
| H | 7.41478   | -7.15212 | -2.93683 |
| H | 6.47645   | -6.67099 | -4.45888 |
| H | 7.88410   | -5.12594 | -4.10927 |

|    |           |          |          |
|----|-----------|----------|----------|
| H  | 6.67157   | -3.03246 | -3.53866 |
| H  | 5.63408   | -4.31145 | -4.44898 |
| H  | 5.43474   | -4.10117 | -2.67130 |
| H  | 8.38459   | -3.72398 | -2.10652 |
| H  | 7.54129   | -4.92255 | -1.05811 |
| H  | 8.99941   | -5.34703 | -1.98228 |
| N  | -15.71689 | -1.30721 | 3.36840  |
| C  | -16.36253 | -2.32273 | 2.49847  |
| C  | -15.76883 | -3.77023 | 2.69510  |
| O  | -16.33248 | -4.78305 | 2.30950  |
| C  | -16.07380 | -1.93021 | 1.00912  |
| C  | -16.00214 | -0.40852 | 1.14998  |
| C  | -15.27363 | -0.20004 | 2.50921  |
| H  | -17.40965 | -2.37367 | 2.75447  |
| H  | -15.05115 | -2.28207 | 0.72400  |
| H  | -16.83630 | -2.37459 | 0.33501  |
| H  | -15.46249 | 0.09899  | 0.32117  |
| H  | -17.03418 | 0.00440  | 1.10331  |
| H  | -14.16996 | -0.26681 | 2.52200  |
| H  | -15.50340 | 0.80062  | 2.94701  |
| N  | -14.60356 | -3.85299 | 3.36838  |
| C  | -13.99386 | -5.18928 | 3.59285  |
| C  | -13.33370 | -5.28738 | 4.93377  |
| O  | -12.16900 | -4.91941 | 4.96004  |
| C  | -12.77035 | -5.34335 | 2.62141  |
| C  | -13.23493 | -5.65233 | 1.23892  |
| C  | -13.99526 | -6.69087 | 0.90389  |
| N  | -12.74516 | -5.01002 | 0.10871  |
| C  | -13.24889 | -5.67787 | -0.90259 |
| N  | -13.95445 | -6.75770 | -0.47218 |
| H  | -14.03139 | -3.04322 | 3.46833  |
| H  | -14.67573 | -5.99848 | 3.38491  |
| H  | -12.13192 | -4.44764 | 2.70636  |
| H  | -12.16665 | -6.21828 | 2.94241  |
| H  | -14.37007 | -7.42282 | 1.61499  |
| H  | -12.99662 | -5.55576 | -1.95542 |
| H  | -14.23879 | -7.59169 | -0.94611 |
| Cu | -11.70064 | -1.62947 | -3.09730 |
| C  | 11.16589  | 0.79805  | -3.87439 |
| C  | 16.46611  | -3.02061 | 3.31574  |
| C  | 14.83746  | 4.42278  | 5.63101  |
| C  | 10.75314  | 5.55864  | -1.02425 |
| N  | 13.25094  | 0.74611  | -0.76120 |
| C  | 9.85447   | 0.17319  | -3.39371 |
| C  | 16.91296  | -4.21372 | 3.09437  |
| C  | 15.26302  | 4.60652  | 6.89693  |
| C  | 11.16682  | 5.65683  | -2.54116 |
| N  | 14.57468  | -0.46023 | 1.38865  |
| C  | 8.55249   | 0.34980  | -4.22669 |
| C  | 11.46995  | 7.14953  | -2.87725 |
| N  | 12.87470  | 3.03597  | 0.78873  |
| C  | 11.83573  | 2.67798  | -1.33186 |
| C  | 14.15236  | -1.42545 | -0.78008 |
| C  | 15.37319  | -0.11666 | 3.69786  |
| C  | 13.66609  | 4.26866  | 2.78675  |
| C  | 13.25726  | -1.43374 | -3.75513 |
| C  | 15.65140  | -3.72832 | 0.31549  |
| C  | 15.59462  | 1.45252  | 6.25257  |
| C  | 11.89697  | 6.56030  | 1.74047  |
| C  | 12.36653  | 1.39486  | -1.60472 |
| C  | 14.69569  | -1.45850 | 0.49746  |
| C  | 14.97249  | 1.23196  | 3.81392  |
| C  | 12.95321  | 4.15661  | 1.62234  |
| O  | 8.44131   | -0.11814 | -5.33199 |

|    |           |          |          |
|----|-----------|----------|----------|
| O  | 12.63675  | 7.32682  | -3.25415 |
| C  | 12.22388  | 0.63274  | -2.82776 |
| C  | 15.35980  | -2.54376 | 1.06708  |
| C  | 15.21181  | 2.02308  | 4.97687  |
| C  | 12.18228  | 5.21987  | 1.14815  |
| O  | 7.65407   | 1.02434  | -3.66418 |
| O  | 10.54549  | 7.98942  | -2.85593 |
| C  | 13.06237  | -0.39822 | -2.73684 |
| C  | 15.77154  | -2.27670 | 2.34932  |
| C  | 14.85887  | 3.30048  | 4.82922  |
| C  | 11.59129  | 4.76906  | -0.05854 |
| C  | 13.58162  | -0.32626 | -1.39077 |
| C  | 15.24404  | -0.93113 | 2.51453  |
| C  | 14.34312  | 3.22730  | 3.42496  |
| C  | 12.07531  | 3.43975  | -0.20265 |
| N  | 14.37798  | 1.97096  | 2.83472  |
| Fe | 13.75966  | 1.31636  | 1.04638  |
| H  | -3.05965  | 2.49428  | 0.50993  |
| H  | -5.11266  | -3.51530 | -3.70379 |
| H  | -5.51326  | -5.74391 | -0.10991 |
| H  | -3.63970  | -2.98651 | 2.33009  |
| H  | -15.57680 | 7.10010  | 1.91193  |
| H  | 5.11776   | -4.71880 | 1.99592  |
| H  | -12.06856 | 7.72147  | -4.16382 |
| H  | 4.00284   | -8.52616 | -3.15762 |
| H  | -16.38592 | -0.96524 | 4.05890  |
| H  | -13.36655 | -6.30988 | 5.24689  |
| H  | -13.87227 | -4.62895 | 5.58288  |
| H  | -11.63676 | -5.48895 | 4.38293  |
| H  | 11.01363  | 1.84053  | -4.06399 |
| H  | 11.47992  | 0.30934  | -4.77237 |
| H  | 16.62701  | -2.59675 | 4.24280  |
| H  | 14.42764  | 5.26011  | 5.18825  |
| H  | 9.77229   | 5.13129  | -0.99989 |
| H  | 10.86560  | 6.56392  | -0.67628 |
| H  | 10.02708  | -0.87919 | -3.31094 |
| H  | 9.64284   | 0.71162  | -2.49319 |
| H  | 16.76448  | -4.65820 | 2.17468  |
| H  | 17.41857  | -4.72132 | 3.83723  |
| H  | 15.68636  | 3.82248  | 7.41792  |
| H  | 15.16462  | 5.53107  | 7.34560  |
| H  | 12.04009  | 5.06307  | -2.71592 |
| H  | 10.37274  | 5.29602  | -3.16135 |
| H  | 11.20989  | 3.08435  | -2.04443 |
| H  | 14.17778  | -2.30295 | -1.32297 |
| H  | 15.79454  | -0.55732 | 4.53066  |
| H  | 13.70600  | 5.20049  | 3.22950  |
| H  | 12.72496  | -1.16540 | -4.64392 |
| H  | 12.88946  | -2.36906 | -3.38751 |
| H  | 14.30002  | -1.52339 | -3.97717 |
| H  | 15.19902  | -3.65706 | -0.65200 |
| H  | 15.26144  | -4.58212 | 0.82958  |
| H  | 16.71125  | -3.83042 | 0.20696  |
| H  | 15.71788  | 2.23606  | 6.97135  |
| H  | 16.51705  | 0.92035  | 6.14254  |
| H  | 14.83220  | 0.78012  | 6.58597  |
| H  | 11.25922  | 7.11272  | 1.08272  |
| H  | 12.81483  | 7.09274  | 1.87732  |
| H  | 11.41300  | 6.43643  | 2.68643  |
| H  | 9.14394   | -0.61376 | -5.70364 |
| H  | 13.25005  | 6.61959  | -3.22599 |

Geometry of Pathway ET5

|   |          |          |          |
|---|----------|----------|----------|
| N | 10.64460 | -3.82043 | 0.29063  |
| C | 10.20688 | -2.89117 | -0.80586 |
| C | 11.21051 | -1.80869 | -0.86113 |
| O | 11.05702 | -0.78844 | -1.55856 |
| C | 8.76000  | -2.26348 | -0.65143 |
| C | 7.64233  | -3.33271 | -0.46609 |
| C | 7.36047  | -4.09930 | -1.79059 |
| N | 6.20869  | -5.04651 | -1.56992 |
| C | 5.55228  | -5.61460 | -2.58570 |
| N | 6.09992  | -5.55995 | -3.80016 |
| N | 4.28931  | -5.95730 | -2.44875 |
| H | 10.66775 | -3.48446 | 1.21922  |
| H | 10.25097 | -3.41188 | -1.75049 |
| H | 8.80735  | -1.61736 | 0.24834  |
| H | 8.64148  | -1.73775 | -1.61686 |
| H | 7.79733  | -4.01919 | 0.39625  |
| H | 6.77021  | -2.66829 | -0.30816 |
| H | 7.20503  | -3.46448 | -2.69571 |
| H | 8.23681  | -4.74432 | -1.98601 |
| H | 5.52434  | -4.73900 | -0.90351 |
| H | 6.94728  | -5.11836 | -4.06861 |
| H | 5.50787  | -5.65010 | -4.60138 |
| H | 3.88446  | -5.53624 | -1.64419 |
| H | 3.78537  | -5.94426 | -3.31470 |
| N | 12.37842 | -1.90378 | -0.25115 |
| C | 13.33867 | -0.85553 | -0.28100 |
| C | 14.65269 | -1.41848 | -0.69687 |
| O | 14.87459 | -2.59966 | -0.82716 |
| C | 13.42039 | -0.14013 | 1.01855  |
| C | 14.06705 | -0.79334 | 2.24933  |
| C | 14.05028 | -0.05005 | 3.54426  |
| O | 13.27935 | 0.91946  | 3.71141  |
| O | 14.80782 | -0.49457 | 4.40741  |
| H | 12.51315 | -2.68849 | 0.34204  |
| H | 13.09914 | -0.09948 | -1.02080 |
| H | 13.84877 | 0.88221  | 0.91559  |
| H | 12.36097 | 0.08940  | 1.26645  |
| H | 13.75156 | -1.85638 | 2.38391  |
| H | 15.12712 | -0.91270 | 1.93850  |
| N | 4.93650  | 4.80478  | 0.56892  |
| C | 4.72583  | 3.55446  | -0.08578 |
| C | 3.28683  | 3.30079  | -0.29057 |
| O | 2.50973  | 3.54019  | 0.57823  |
| C | 5.36573  | 2.42335  | 0.78492  |
| C | 5.17664  | 1.10781  | 0.09890  |
| C | 6.03384  | 0.78630  | -1.00343 |
| C | 4.15432  | 0.27340  | 0.44847  |
| C | 5.81697  | -0.47093 | -1.65439 |
| C | 3.92635  | -0.93468 | -0.21030 |
| C | 4.73053  | -1.26306 | -1.30614 |
| O | 4.47523  | -2.46732 | -2.03002 |
| H | 4.36979  | 4.92876  | 1.38559  |
| H | 5.18278  | 3.48612  | -1.06201 |
| H | 6.45318  | 2.65573  | 0.71519  |
| H | 5.01144  | 2.33992  | 1.83816  |
| H | 6.86407  | 1.35690  | -1.38307 |
| H | 3.39685  | 0.60334  | 1.14230  |
| H | 6.41656  | -0.80815 | -2.48972 |
| H | 3.09945  | -1.58920 | 0.04627  |
| H | 4.31119  | -3.09855 | -1.32693 |
| N | 2.88070  | 2.87144  | -1.51850 |
| C | 1.54097  | 2.80095  | -1.88939 |
| C | 1.61935  | 1.79581  | -2.89684 |
| O | 2.60938  | 1.52981  | -3.59547 |

|    |           |          |          |
|----|-----------|----------|----------|
| C  | 1.15365   | 4.11522  | -2.64495 |
| C  | 1.28153   | 5.37823  | -1.72894 |
| C  | 0.45680   | 5.85577  | -0.76626 |
| C  | 2.34507   | 6.29288  | -1.88835 |
| C  | 2.07006   | 7.34169  | -0.99238 |
| C  | 3.52883   | 6.34155  | -2.67443 |
| N  | 0.87691   | 7.08712  | -0.36191 |
| C  | 2.90045   | 8.42365  | -0.90735 |
| C  | 4.27815   | 7.51004  | -2.69773 |
| C  | 3.96204   | 8.52828  | -1.84621 |
| H  | 3.58152   | 2.49626  | -2.12207 |
| H  | 0.87014   | 2.66342  | -1.05971 |
| H  | 1.80842   | 4.38622  | -3.49538 |
| H  | 0.09108   | 4.07674  | -2.95216 |
| H  | -0.44434  | 5.35363  | -0.43116 |
| H  | 0.26342   | 7.68332  | 0.12580  |
| H  | 3.54462   | 5.54095  | -3.40702 |
| H  | 2.71125   | 9.20232  | -0.18156 |
| H  | 4.97094   | 7.66228  | -3.51734 |
| H  | 4.63501   | 9.37695  | -1.89157 |
| Cu | 16.19898  | -1.70582 | 5.92106  |
| C  | -5.10443  | 1.94126  | -1.96806 |
| C  | -12.39708 | 2.35487  | 4.43652  |
| C  | -11.92474 | -5.29703 | 2.28192  |
| C  | -5.85996  | -3.54963 | -2.45404 |
| N  | -8.12261  | 0.77507  | -0.07790 |
| C  | -4.01383  | 1.88998  | -0.89602 |
| C  | -12.69838 | 3.54271  | 4.84938  |
| C  | -12.76271 | -6.03315 | 3.03911  |
| C  | -5.73496  | -2.71571 | -3.78474 |
| N  | -10.05557 | 0.89176  | 1.94186  |
| C  | -2.51313  | 1.90116  | -1.30587 |
| C  | -5.95894  | -3.67476 | -4.99430 |
| N  | -8.38010  | -2.00315 | -0.12832 |
| C  | -6.66824  | -0.80343 | -1.28362 |
| C  | -8.88469  | 2.74957  | 0.94639  |
| C  | -11.60534 | -0.45280 | 3.31245  |
| C  | -9.84913  | -3.90161 | 0.48460  |
| C  | -7.02928  | 4.16023  | -1.10780 |
| C  | -10.58339 | 4.36413  | 2.75144  |
| C  | -12.74086 | -3.05413 | 4.30317  |
| C  | -7.91312  | -5.59506 | -1.20662 |
| C  | -7.02760  | 0.50422  | -0.87928 |
| C  | -9.82944  | 2.20957  | 1.80909  |
| C  | -11.31709 | -1.69926 | 2.71575  |
| C  | -8.77844  | -3.34368 | -0.16266 |
| O  | -2.01501  | 2.85219  | -1.85397 |
| O  | -6.93294  | -3.34975 | -5.68756 |
| C  | -6.44917  | 1.75009  | -1.33779 |
| C  | -10.60838 | 2.93204  | 2.71163  |
| C  | -11.96690 | -2.91420 | 3.08624  |
| C  | -7.93089  | -4.12414 | -0.95149 |
| O  | -1.88524  | 0.84662  | -1.03700 |
| O  | -5.12804  | -4.57681 | -5.23183 |
| C  | -7.23068  | 2.72678  | -0.88007 |
| C  | -11.44194 | 2.11644  | 3.43619  |
| C  | -11.63106 | -3.94963 | 2.31606  |
| C  | -6.94808  | -3.24120 | -1.46441 |
| C  | -8.17996  | 2.05922  | -0.01988 |
| C  | -11.05124 | 0.81710  | 2.91164  |
| C  | -10.66518 | -3.24885 | 1.41092  |
| C  | -7.30572  | -1.97630 | -0.92198 |
| N  | -10.45142 | -1.90408 | 1.68277  |
| Fe | -9.23728  | -0.54798 | 0.84857  |



|   |           |          |          |
|---|-----------|----------|----------|
| H | 10.01130  | -4.61957 | 0.27646  |
| H | 15.42291  | -0.75793 | -0.88628 |
| H | 4.72247   | 5.55425  | -0.08982 |
| H | 0.76916   | 1.23452  | -3.06111 |
| H | -4.93433  | 1.16441  | -2.68464 |
| H | -5.07568  | 2.89372  | -2.45368 |
| H | -12.87955 | 1.54715  | 4.86050  |
| H | -11.41898 | -5.82938 | 1.55671  |
| H | -4.93145  | -3.43933 | -1.93348 |
| H | -6.12046  | -4.52662 | -2.80325 |
| H | -4.16626  | 2.73718  | -0.26106 |
| H | -4.14144  | 0.91912  | -0.46381 |
| H | -12.22934 | 4.36599  | 4.43994  |
| H | -13.40831 | 3.66752  | 5.58801  |
| H | -13.30975 | -5.58317 | 3.78986  |
| H | -12.85656 | -7.04703 | 2.86875  |
| H | -6.47432  | -1.94183 | -3.79609 |
| H | -4.76455  | -2.26868 | -3.84693 |
| H | -5.85204  | -0.88989 | -1.90885 |
| H | -8.69185  | 3.75964  | 1.03548  |
| H | -12.26918 | -0.44995 | 4.10274  |
| H | -10.07115 | -4.88677 | 0.26990  |
| H | -6.23590  | 4.30206  | -1.81189 |
| H | -6.77538  | 4.63593  | -0.18342 |
| H | -7.92992  | 4.58969  | -1.49393 |
| H | -9.83115  | 4.72632  | 2.08156  |
| H | -10.36154 | 4.68962  | 3.74651  |
| H | -11.53833 | 4.74624  | 2.45553  |
| H | -13.12993 | -4.04934 | 4.36618  |
| H | -13.55070 | -2.35396 | 4.29297  |
| H | -12.11406 | -2.86261 | 5.14875  |
| H | -7.10969  | -5.83218 | -1.87205 |
| H | -8.84121  | -5.89192 | -1.64846 |
| H | -7.77651  | -6.11568 | -0.28212 |
| H | -2.53049  | 3.61416  | -2.03039 |
| H | -7.49317  | -2.65261 | -5.40968 |

### Geometry of Pathway ET6

|   |          |          |          |
|---|----------|----------|----------|
| N | 10.66926 | -3.80496 | 0.65697  |
| C | 10.23118 | -2.89136 | -0.45245 |
| C | 11.23569 | -1.81069 | -0.52452 |
| O | 11.08233 | -0.80055 | -1.23656 |
| C | 8.78501  | -2.26021 | -0.30564 |
| C | 7.66661  | -3.32564 | -0.10357 |
| C | 7.38267  | -4.11117 | -1.41648 |
| N | 6.23030  | -5.05405 | -1.18084 |
| C | 5.57231  | -5.63628 | -2.18755 |
| N | 6.11869  | -5.59979 | -3.40325 |
| N | 4.30918  | -5.97584 | -2.04429 |
| H | 10.69370 | -3.45553 | 1.58055  |
| H | 10.27379 | -3.42579 | -1.38945 |
| H | 8.83389  | -1.60111 | 0.58459  |
| H | 8.66591  | -1.74848 | -1.27849 |
| H | 7.82194  | -3.99964 | 0.76849  |
| H | 6.79523  | -2.65822 | 0.04560  |
| H | 7.22681  | -3.48945 | -2.33058 |
| H | 8.25823  | -4.75974 | -1.60343 |
| H | 5.54693  | -4.73628 | -0.51825 |
| H | 6.96615  | -5.16290 | -3.67900 |
| H | 5.52571  | -5.70106 | -4.20245 |
| H | 3.90557  | -5.54276 | -1.24551 |
| H | 3.80433  | -5.97495 | -2.90980 |
| N | 12.40416 | -1.89793 | 0.08553  |

|   |          |          |          |
|---|----------|----------|----------|
| C | 13.36529 | -0.85108 | 0.03942  |
| C | 14.67838 | -1.42118 | -0.36961 |
| O | 14.89911 | -2.60432 | -0.48293 |
| C | 13.44903 | -0.11692 | 1.32834  |
| C | 14.09644 | -0.75272 | 2.56781  |
| C | 14.08170 | 0.00935  | 3.85180  |
| O | 13.31180 | 0.98186  | 4.00564  |
| O | 14.83978 | -0.42324 | 4.72053  |
| H | 12.53885 | -2.67405 | 0.68993  |
| H | 13.12563 | -0.10565 | -0.71105 |
| H | 13.87819 | 0.90344  | 1.21006  |
| H | 12.39008 | 0.11714  | 1.57400  |
| H | 13.78017 | -1.81341 | 2.71817  |
| H | 15.15607 | -0.87752 | 2.25763  |
| N | 4.96896  | 4.82843  | 0.81579  |
| C | 4.75650  | 3.56890  | 0.17958  |
| C | 3.31706  | 3.31355  | -0.01997 |
| O | 2.54110  | 3.56625  | 0.84607  |
| C | 5.39635  | 2.45001  | 1.06596  |
| C | 5.20538  | 1.12481  | 0.39936  |
| C | 6.06112  | 0.78653  | -0.69909 |
| C | 4.18271  | 0.29647  | 0.76212  |
| C | 5.84246  | -0.47984 | -1.33146 |
| C | 3.95299  | -0.92086 | 0.12123  |
| C | 4.75571  | -1.26586 | -0.97056 |
| O | 4.49859  | -2.48029 | -1.67657 |
| H | 4.40323  | 4.96478  | 1.63118  |
| H | 5.21235  | 3.48597  | -0.79603 |
| H | 6.48392  | 2.68039  | 0.99171  |
| H | 5.04311  | 2.38223  | 2.12068  |
| H | 6.89144  | 1.35082  | -1.08787 |
| H | 3.42628  | 0.63714  | 1.45187  |
| H | 6.44086  | -0.82971 | -2.16243 |
| H | 3.12580  | -1.57085 | 0.38817  |
| H | 4.33475  | -3.10109 | -0.96420 |
| N | 2.90924  | 2.86675  | -1.24110 |
| C | 1.56906  | 2.79205  | -1.60950 |
| C | 1.64549  | 1.77230  | -2.60230 |
| O | 2.63453  | 1.49529  | -3.29804 |
| C | 1.18207  | 4.09554  | -2.38369 |
| C | 1.31203  | 5.37162  | -1.48630 |
| C | 0.48875  | 5.86385  | -0.52979 |
| C | 2.37619  | 6.28291  | -1.66012 |
| C | 2.10305  | 7.34490  | -0.77922 |
| C | 3.55915  | 6.31909  | -2.44808 |
| N | 0.91036  | 7.10058  | -0.14385 |
| C | 2.93447  | 8.42724  | -0.71081 |
| C | 4.30946  | 7.48647  | -2.48917 |
| C | 3.99515  | 8.51726  | -1.65222 |
| H | 3.60909  | 2.48221  | -1.83988 |
| H | 0.89900  | 2.66720  | -0.77720 |
| H | 1.83616  | 4.35355  | -3.23867 |
| H | 0.11914  | 4.05353  | -2.68919 |
| H | -0.41247 | 5.36743  | -0.18646 |
| H | 0.29791  | 7.70435  | 0.33579  |
| H | 3.57346  | 5.50791  | -3.16896 |
| H | 2.74673  | 9.21656  | 0.00377  |
| H | 5.00150  | 7.62615  | -3.31164 |
| H | 4.66881  | 9.36459  | -1.71063 |
| N | 0.49103  | 1.14405  | -2.87696 |
| C | 0.34307  | 0.02725  | -3.83187 |
| C | 0.47749  | 0.58921  | -5.24393 |
| O | 0.83695  | -0.03818 | -6.20016 |
| C | -1.10294 | -0.46232 | -3.70432 |

|    |           |          |          |
|----|-----------|----------|----------|
| C  | -1.45531  | -1.63524 | -4.64634 |
| O  | -1.39540  | -1.01937 | -2.43437 |
| H  | -0.23134  | 1.27750  | -2.21538 |
| H  | 1.11998   | -0.67023 | -3.56179 |
| H  | -1.84859  | 0.34938  | -3.85040 |
| H  | -1.61929  | -0.27427 | -1.85704 |
| H  | -1.40816  | -1.26950 | -5.68952 |
| H  | -0.65389  | -2.39942 | -4.53390 |
| H  | -2.47546  | -2.04120 | -4.43783 |
| Cu | 16.23151  | -1.61358 | 6.25016  |
| C  | -5.07716  | 1.93719  | -1.66862 |
| C  | -12.36259 | 2.45038  | 4.73698  |
| C  | -11.89921 | -5.23247 | 2.69343  |
| C  | -5.83799  | -3.55952 | -2.07386 |
| N  | -8.09433  | 0.80128  | 0.24150  |
| C  | -3.98547  | 1.90054  | -0.59710 |
| C  | -12.66241 | 3.64436  | 5.13284  |
| C  | -12.73700 | -5.95676 | 3.46214  |
| C  | -5.71369  | -2.74516 | -3.41668 |
| N  | -10.02502 | 0.94905  | 2.26139  |
| C  | -2.48520  | 1.90443  | -1.00866 |
| C  | -5.93980  | -3.72151 | -4.61193 |
| N  | -8.35429  | -1.97714 | 0.23178  |
| C  | -6.64263  | -0.79587 | -0.94267 |
| C  | -8.85360  | 2.79115  | 1.23775  |
| C  | -11.57449 | -0.37405 | 3.65304  |
| C  | -9.82432  | -3.86519 | 0.87381  |
| C  | -6.99916  | 4.17014  | -0.83870 |
| C  | -10.54896 | 4.43330  | 3.02092  |
| C  | -12.71121 | -2.95969 | 4.68271  |
| C  | -7.89159  | -5.58477 | -0.79464 |
| C  | -7.00042  | 0.51784  | -0.55701 |
| C  | -9.79789  | 2.26460  | 2.10922  |
| C  | -11.28796 | -1.62931 | 3.07424  |
| C  | -8.75383  | -3.31768 | 0.21737  |
| O  | -1.98684  | 2.84695  | -1.57107 |
| O  | -6.91425  | -3.40576 | -5.30881 |
| C  | -6.42139  | 1.75639  | -1.03422 |
| C  | -10.57524 | 3.00081  | 3.00198  |
| C  | -11.93844 | -2.83816 | 3.46305  |
| C  | -7.90781  | -4.11028 | -0.56092 |
| O  | -1.85793  | 0.85336  | -0.72515 |
| O  | -5.10994  | -4.62765 | -4.83718 |
| C  | -7.20157  | 2.74033  | -0.58992 |
| C  | -11.40873 | 2.19658  | 3.73921  |
| C  | -11.60431 | -3.88498 | 2.70766  |
| C  | -6.92478  | -3.23576 | -1.08768 |
| C  | -8.15051  | 2.08619  | 0.28089  |
| C  | -11.01972 | 0.88939  | 3.23321  |
| C  | -10.63880 | -3.19829 | 1.79139  |
| C  | -7.28074  | -1.96280 | -0.56332 |
| N  | -10.42358 | -1.84990 | 2.04342  |
| Fe | -9.20916  | -0.50716 | 1.18830  |
| H  | 10.03525  | -4.60366 | 0.65510  |
| H  | 15.44897  | -0.76413 | -0.56942 |
| H  | 4.75488   | 5.56842  | 0.14645  |
| H  | 0.24130   | 1.58315  | -5.38637 |
| H  | -4.90851  | 1.14985  | -2.37400 |
| H  | -5.04811  | 2.88245  | -2.16808 |
| H  | -12.84531 | 1.64933  | 5.17318  |
| H  | -11.39469 | -5.77576 | 1.97552  |
| H  | -4.90882  | -3.44249 | -1.55594 |
| H  | -6.09971  | -4.54126 | -2.40854 |
| H  | -4.13648  | 2.75703  | 0.02562  |

|   |           |          |          |
|---|-----------|----------|----------|
| H | -4.11345  | 0.93619  | -0.15068 |
| H | -12.19309 | 4.46119  | 4.71097  |
| H | -13.37144 | 3.78053  | 5.87032  |
| H | -13.28284 | -5.49542 | 4.20685  |
| H | -12.83191 | -6.97292 | 3.30665  |
| H | -6.45239  | -1.97087 | -3.43852 |
| H | -4.74296  | -2.29994 | -3.48640 |
| H | -5.82718  | -0.89214 | -1.56744 |
| H | -8.65979  | 3.80225  | 1.31194  |
| H | -12.23749 | -0.35912 | 4.44391  |
| H | -10.04742 | -4.85317 | 0.67370  |
| H | -6.20642  | 4.30101  | -1.54561 |
| H | -6.74387  | 4.65902  | 0.07840  |
| H | -7.89985  | 4.59474  | -1.23008 |
| H | -9.79712  | 4.78505  | 2.34505  |
| H | -10.32576 | 4.77304  | 4.01092  |
| H | -11.50388 | 4.81192  | 2.72050  |
| H | -13.10108 | -3.95352 | 4.76060  |
| H | -13.52045 | -2.25902 | 4.66317  |
| H | -12.08334 | -2.75644 | 5.52475  |
| H | -7.08908  | -5.83226 | -1.45740 |
| H | -8.82040  | -5.88721 | -1.23113 |
| H | -7.75444  | -6.09201 | 0.13719  |
| H | -2.50185  | 3.60672  | -1.75801 |
| H | -7.47359  | -2.70415 | -5.04051 |

#### Geometry of Pathway ET7

|   |           |          |          |
|---|-----------|----------|----------|
| N | -7.49953  | 1.72807  | 2.15858  |
| C | -7.03865  | 1.35529  | 0.77799  |
| C | -7.95365  | 0.29688  | 0.30402  |
| O | -7.75044  | -0.34357 | -0.74452 |
| C | -5.54057  | 0.85334  | 0.65504  |
| C | -4.50508  | 1.85842  | 1.24186  |
| C | -4.34578  | 3.11044  | 0.33166  |
| N | -3.26494  | 3.99320  | 0.90176  |
| C | -2.70281  | 4.97563  | 0.19166  |
| N | -3.29861  | 5.35806  | -0.93819 |
| N | -1.46652  | 5.34985  | 0.44234  |
| H | -7.45366  | 1.05024  | 2.87561  |
| H | -7.16702  | 2.20200  | 0.12073  |
| H | -5.49521  | -0.09845 | 1.22191  |
| H | -5.42399  | 0.76772  | -0.44113 |
| H | -4.67554  | 2.12845  | 2.30813  |
| H | -3.57620  | 1.26889  | 1.11284  |
| H | -4.18096  | 2.90463  | -0.75318 |
| H | -5.27899  | 3.69677  | 0.41860  |
| H | -2.52871  | 3.51035  | 1.38323  |
| H | -4.11907  | 4.98386  | -1.35283 |
| H | -2.75252  | 5.81295  | -1.64209 |
| H | -0.99324  | 4.68283  | 1.00766  |
| H | -1.00280  | 5.72816  | -0.36131 |
| N | -12.19420 | -1.32618 | -0.19124 |
| C | -13.54529 | -0.95004 | -0.53719 |
| C | -14.46923 | -0.84991 | 0.65516  |
| O | -15.30310 | 0.06653  | 0.74950  |
| C | -14.04423 | -1.92988 | -1.58746 |
| H | -11.94253 | -2.21206 | -0.56309 |
| H | -13.65640 | 0.03279  | -0.97135 |
| H | -13.23743 | -2.27788 | -2.27125 |
| H | -14.32632 | -2.84893 | -1.01792 |
| H | -14.91060 | -1.44677 | -2.07696 |
| N | -14.39630 | -1.83843 | 1.57130  |
| C | -15.13560 | -1.89559 | 2.84219  |

|   |           |          |          |
|---|-----------|----------|----------|
| C | -14.53474 | -1.16777 | 4.05089  |
| O | -13.52076 | -1.56647 | 4.60432  |
| C | -15.28955 | -3.40723 | 3.20846  |
| C | -16.40331 | -3.88461 | 4.15780  |
| S | -18.04037 | -3.20514 | 4.01062  |
| C | -18.83148 | -4.06287 | 5.44764  |
| H | -13.79591 | -2.63142 | 1.44166  |
| H | -16.10898 | -1.51952 | 2.56434  |
| H | -15.42362 | -4.01320 | 2.28465  |
| H | -14.28934 | -3.78589 | 3.51227  |
| H | -16.46350 | -4.99521 | 4.21297  |
| H | -16.08311 | -3.55926 | 5.16939  |
| H | -18.37937 | -3.72078 | 6.40162  |
| H | -19.89856 | -3.76942 | 5.47800  |
| H | -18.75575 | -5.16722 | 5.46697  |
| N | -12.93959 | 4.10861  | 0.29824  |
| C | -11.73962 | 3.69459  | -0.42096 |
| C | -10.89579 | 4.87285  | -0.93257 |
| O | -11.47465 | 5.69054  | -1.61258 |
| C | -12.16389 | 2.95709  | -1.68985 |
| C | -11.08330 | 2.13871  | -2.43011 |
| C | -11.61907 | 1.34912  | -3.66218 |
| C | -10.57526 | 0.33770  | -4.14870 |
| N | -11.23604 | -0.47808 | -5.22335 |
| H | -13.80973 | 3.85352  | -0.14175 |
| H | -11.19824 | 3.03529  | 0.23658  |
| H | -12.89810 | 2.19162  | -1.33502 |
| H | -12.70638 | 3.63012  | -2.39108 |
| H | -10.33684 | 2.82129  | -2.88681 |
| H | -10.60447 | 1.52741  | -1.64149 |
| H | -12.62842 | 0.93302  | -3.46964 |
| H | -11.82804 | 2.13513  | -4.43484 |
| H | -9.69391  | 0.79034  | -4.64453 |
| H | -10.30237 | -0.37418 | -3.33836 |
| H | -11.51027 | -0.01496 | -6.10727 |
| H | -10.55033 | -1.18453 | -5.57509 |
| H | -12.05611 | -1.03457 | -4.88987 |
| N | -9.55368  | 4.91720  | -0.58922 |
| C | -8.64717  | 5.98820  | -1.04921 |
| C | -9.16605  | 7.32131  | -0.54138 |
| O | -9.40197  | 8.35538  | -1.18047 |
| C | -8.40199  | 5.96611  | -2.58404 |
| C | -7.60744  | 4.81758  | -3.26973 |
| C | -6.13072  | 5.06447  | -3.13388 |
| O | -5.55240  | 5.76064  | -3.96640 |
| O | -5.46340  | 4.34244  | -2.32768 |
| H | -9.09197  | 4.23939  | -0.03615 |
| H | -7.64260  | 5.93004  | -0.65621 |
| H | -9.37917  | 5.85950  | -3.10275 |
| H | -7.91879  | 6.89365  | -2.97530 |
| H | -8.02378  | 3.84414  | -2.91749 |
| H | -7.80981  | 4.82814  | -4.36181 |
| N | -1.11095  | -5.73525 | -1.08781 |
| C | -1.03110  | -4.31417 | -1.19005 |
| C | 0.37217   | -3.86935 | -1.28985 |
| O | 1.20444   | -4.36191 | -0.59652 |
| C | -1.71971  | -3.68590 | 0.06617  |
| C | -1.66799  | -2.19481 | -0.03850 |
| C | -2.59716  | -1.54181 | -0.91231 |
| C | -0.70117  | -1.47812 | 0.60587  |
| C | -2.51152  | -0.11533 | -1.00843 |
| C | -0.60089  | -0.09240 | 0.48285  |
| C | -1.47753  | 0.56914  | -0.38276 |
| O | -1.35266  | 1.97974  | -0.56724 |

|    |           |          |          |
|----|-----------|----------|----------|
| H  | -0.49980  | -6.12101 | -0.39414 |
| H  | -1.53571  | -3.90579 | -2.05324 |
| H  | -2.78703  | -3.97002 | -0.08043 |
| H  | -1.32602  | -3.99572 | 1.06157  |
| H  | -3.39522  | -1.98806 | -1.48059 |
| H  | 0.11090   | -1.98565 | 1.10281  |
| H  | -3.17337  | 0.46953  | -1.63364 |
| H  | 0.18156   | 0.47907  | 0.97190  |
| H  | -1.20820  | 2.29182  | 0.32799  |
| N  | 0.68664   | -2.95224 | -2.24752 |
| C  | 1.99825   | -2.61778 | -2.57186 |
| C  | 1.79402   | -1.30691 | -3.09272 |
| O  | 0.75528   | -0.87716 | -3.61745 |
| C  | 2.45526   | -3.48218 | -3.79340 |
| C  | 2.47066   | -5.01108 | -3.45749 |
| C  | 3.37371   | -5.75404 | -2.77375 |
| C  | 1.47784   | -5.88036 | -3.95925 |
| C  | 1.87634   | -7.16881 | -3.55988 |
| C  | 0.26749   | -5.72094 | -4.68811 |
| N  | 3.07247   | -7.07753 | -2.89143 |
| C  | 1.14014   | -8.26661 | -3.90666 |
| C  | -0.38592  | -6.84730 | -5.16955 |
| C  | 0.04903   | -8.08640 | -4.79907 |
| H  | -0.06858  | -2.43408 | -2.64418 |
| H  | 2.69269   | -2.76037 | -1.76270 |
| H  | 1.78659   | -3.45174 | -4.67507 |
| H  | 3.49633   | -3.22764 | -4.06956 |
| H  | 4.24588   | -5.34611 | -2.27433 |
| H  | 3.75324   | -7.75948 | -2.68849 |
| H  | 0.15442   | -4.70030 | -5.03941 |
| H  | 1.42382   | -9.24864 | -3.55447 |
| H  | -1.10059  | -6.72415 | -5.97514 |
| H  | -0.55502  | -8.90496 | -5.17359 |
| Cu | -12.60618 | -2.94863 | 6.52608  |
| C  | 8.54287   | -1.19270 | -2.36263 |
| C  | 16.12713  | -3.44676 | 3.27391  |
| C  | 14.94538  | 4.35297  | 4.36233  |
| C  | 8.83259   | 4.08336  | -0.62017 |
| N  | 11.54005  | -0.60228 | -0.19228 |
| C  | 7.50123   | -1.67172 | -1.34929 |
| C  | 16.54113  | -4.66781 | 3.17467  |
| C  | 15.75493  | 4.80107  | 5.34276  |
| C  | 8.71491   | 3.83913  | -2.17204 |
| N  | 13.56543  | -1.33418 | 1.59421  |
| C  | 5.98929   | -1.65657 | -1.71535 |
| C  | 8.80632   | 5.21593  | -2.89942 |
| N  | 11.57122  | 1.97814  | 0.86968  |
| C  | 9.91070   | 1.18484  | -0.65277 |
| C  | 12.50363  | -2.74233 | -0.04990 |
| C  | 15.06264  | -0.50901 | 3.37341  |
| C  | 12.90936  | 3.60272  | 2.17660  |
| C  | 10.67648  | -3.38428 | -2.47922 |
| C  | 14.40624  | -4.77811 | 0.94322  |
| C  | 16.02936  | 1.57670  | 5.31072  |
| C  | 10.76925  | 5.64355  | 1.32159  |
| C  | 10.39175  | -0.13691 | -0.80826 |
| C  | 13.44001  | -2.50545 | 0.94784  |
| C  | 14.64863  | 0.83980  | 3.32747  |
| C  | 11.85874  | 3.25233  | 1.37035  |
| O  | 5.54484   | -2.35285 | -2.59322 |
| O  | 9.77093   | 5.28383  | -3.67391 |
| C  | 9.89503   | -1.14534 | -1.72114 |
| C  | 14.31441  | -3.45235 | 1.47898  |
| C  | 15.21493  | 1.86150  | 4.14663  |

|    |           |          |          |
|----|-----------|----------|----------|
| C  | 10.91652  | 4.20072  | 0.96727  |
| O  | 5.29159   | -0.85802 | -1.04147 |
| O  | 7.89583   | 6.05783  | -2.74875 |
| C  | 10.77228  | -2.14742 | -1.69936 |
| C  | 15.11172  | -2.91913 | 2.46130  |
| C  | 14.76262  | 3.08218  | 3.85776  |
| C  | 9.98556   | 3.50824  | 0.15340  |
| C  | 11.70283  | -1.79264 | -0.65298 |
| C  | 14.59470  | -1.56008 | 2.50359  |
| C  | 13.81618  | 2.71341  | 2.75705  |
| C  | 10.46770  | 2.17052  | 0.14158  |
| N  | 13.72353  | 1.35791  | 2.47065  |
| Fe | 12.58568  | 0.33984  | 1.17534  |
| H  | -6.93369  | 2.52141  | 2.45910  |
| H  | -8.79363  | 0.08032  | 0.86315  |
| H  | -12.11421 | -1.36216 | 0.82482  |
| H  | -14.99911 | -0.31751 | 4.40669  |
| H  | -12.91649 | 3.68115  | 1.22452  |
| H  | -9.34622  | 7.37282  | 0.47339  |
| H  | -0.86746  | -6.13828 | -1.99320 |
| H  | 2.58814   | -0.65123 | -3.02689 |
| H  | 8.27877   | -0.21425 | -2.70729 |
| H  | 8.56873   | -1.87209 | -3.18822 |
| H  | 16.56190  | -2.83347 | 3.98089  |
| H  | 14.36629  | 5.08085  | 3.91518  |
| H  | 7.94040   | 3.69076  | -0.17842 |
| H  | 8.99780   | 5.13806  | -0.55214 |
| H  | 7.74970   | -2.68360 | -1.10740 |
| H  | 7.56992   | -0.94525 | -0.56624 |
| H  | 16.12165  | -5.29985 | 2.47468  |
| H  | 17.29144  | -5.01019 | 3.79513  |
| H  | 16.36968  | 4.14203  | 5.84587  |
| H  | 15.75932  | 5.80313  | 5.59103  |
| H  | 9.51272   | 3.20475  | -2.49875 |
| H  | 7.78170   | 3.36675  | -2.39865 |
| H  | 9.06279   | 1.43741  | -1.18362 |
| H  | 12.39669  | -3.71770 | -0.37021 |
| H  | 15.75961  | -0.76477 | 4.09041  |
| H  | 13.04168  | 4.60791  | 2.37155  |
| H  | 9.86604   | -3.30674 | -3.17383 |
| H  | 10.50361  | -4.20917 | -1.81974 |
| H  | 11.59031  | -3.54050 | -3.01327 |
| H  | 13.65599  | -4.91161 | 0.19150  |
| H  | 14.25642  | -5.49099 | 1.72725  |
| H  | 15.37442  | -4.92197 | 0.51029  |
| H  | 16.33976  | 2.49604  | 5.76265  |
| H  | 16.89148  | 1.01562  | 5.01387  |
| H  | 15.45881  | 1.00845  | 6.01507  |
| H  | 9.92014   | 6.05084  | 0.81399  |
| H  | 11.64961  | 6.17519  | 1.02658  |
| H  | 10.63322  | 5.73912  | 2.37836  |
| H  | 6.11130   | -2.93128 | -3.06436 |
| H  | 10.39729  | 4.58819  | -3.70314 |

#### Geometry of Pathway ET8

|   |          |          |          |
|---|----------|----------|----------|
| N | 11.27590 | -0.70891 | -2.37985 |
| C | 11.94810 | 0.16229  | -1.49976 |
| C | 11.03942 | 0.80930  | -0.45527 |
| O | 11.32749 | 1.92037  | -0.10793 |
| C | 12.78421 | 1.32374  | -2.15128 |
| C | 13.75944 | 0.81718  | -3.16850 |
| S | 15.44897 | 0.13453  | -2.58329 |
| C | 16.08706 | -0.28374 | -4.23725 |

|   |          |          |          |
|---|----------|----------|----------|
| H | 11.62379 | -1.63854 | -2.37161 |
| H | 12.53704 | -0.49388 | -0.87735 |
| H | 12.08034 | 2.07545  | -2.57835 |
| H | 13.35003 | 1.84588  | -1.36629 |
| H | 13.30488 | 0.08908  | -3.86458 |
| H | 14.18371 | 1.62153  | -3.80679 |
| H | 17.04748 | -0.82903 | -4.16820 |
| H | 15.42966 | -0.97560 | -4.80474 |
| H | 16.23029 | 0.64680  | -4.82876 |
| N | 10.04340 | 0.10279  | 0.00711  |
| C | 9.05529  | 0.78040  | 0.87882  |
| C | 8.19023  | -0.31178 | 1.50093  |
| O | 8.13188  | -1.47056 | 1.12114  |
| C | 8.13289  | 1.77136  | 0.15241  |
| C | 7.13950  | 1.23283  | -0.82496 |
| C | 6.45187  | 2.47137  | -1.52921 |
| C | 4.95304  | 2.25585  | -1.69036 |
| N | 4.57785  | 1.23393  | -2.68390 |
| H | 9.77161  | -0.78665 | -0.34435 |
| H | 9.66033  | 1.15086  | 1.69300  |
| H | 7.58107  | 2.34224  | 0.93834  |
| H | 8.74953  | 2.57012  | -0.31775 |
| H | 7.62402  | 0.63296  | -1.61634 |
| H | 6.38033  | 0.58369  | -0.34496 |
| H | 6.68860  | 3.33256  | -0.86974 |
| H | 6.94238  | 2.57276  | -2.51111 |
| H | 4.55399  | 1.86990  | -0.72740 |
| H | 4.58953  | 3.18724  | -2.17552 |
| H | 4.49503  | 0.27868  | -2.28485 |
| H | 3.62853  | 1.31563  | -3.08380 |
| H | 5.26647  | 1.18599  | -3.46442 |
| N | 4.15542  | -0.85032 | 2.09936  |
| C | 2.92025  | -0.48952 | 1.50584  |
| C | 2.05534  | 0.39508  | 2.39691  |
| O | 1.50789  | 1.42726  | 1.92214  |
| C | 2.11056  | -1.77339 | 1.08814  |
| C | 2.74449  | -2.53683 | -0.07233 |
| C | 3.00484  | -1.56936 | -1.29741 |
| O | 2.06285  | -1.33040 | -2.09242 |
| O | 4.06499  | -0.97469 | -1.40627 |
| H | 4.24429  | -1.84028 | 2.15926  |
| H | 3.18076  | 0.20627  | 0.71525  |
| H | 1.92591  | -2.41991 | 1.96427  |
| H | 1.13328  | -1.34965 | 0.77324  |
| H | 3.72180  | -3.02942 | 0.13139  |
| H | 2.06776  | -3.26890 | -0.57265 |
| N | -4.83152 | 6.68884  | 0.39323  |
| C | -3.60735 | 6.64573  | -0.36582 |
| C | -2.70250 | 7.75505  | -0.10264 |
| O | -1.54891 | 7.68058  | -0.59404 |
| C | -3.88901 | 6.53583  | -1.88094 |
| C | -4.79651 | 5.31958  | -2.20292 |
| C | -6.09197 | 5.23374  | -2.81310 |
| N | -4.42545 | 4.00407  | -1.98720 |
| C | -5.43857 | 3.25293  | -2.41555 |
| N | -6.44669 | 3.92436  | -2.87845 |
| H | -5.50406 | 7.29523  | -0.03288 |
| H | -2.98525 | 5.79942  | -0.13205 |
| H | -4.27109 | 7.44797  | -2.38296 |
| H | -2.87397 | 6.37478  | -2.31067 |
| H | -3.66011 | 3.69519  | -1.42778 |
| H | -6.77686 | 5.98036  | -3.17225 |
| H | -5.41919 | 2.16585  | -2.39357 |
| N | 0.65898  | 6.24235  | 0.47273  |



|    |           |          |          |
|----|-----------|----------|----------|
| C  | 0.28553   | 5.32560  | 1.50355  |
| C  | -0.18333  | 6.11927  | 2.68494  |
| O  | 0.39851   | 7.14083  | 3.01855  |
| H  | -0.05254  | 6.65501  | -0.09247 |
| H  | -0.48738  | 4.69656  | 1.09231  |
| H  | 1.11187   | 4.69148  | 1.77419  |
| N  | 18.36803  | -1.07252 | 4.58113  |
| C  | 18.11607  | 0.29627  | 4.06081  |
| C  | 17.44916  | 1.17002  | 5.07830  |
| O  | 16.22887  | 1.11131  | 5.08368  |
| C  | 17.01513  | 0.20570  | 2.94542  |
| C  | 17.60031  | -0.30268 | 1.67195  |
| C  | 18.61654  | 0.25764  | 1.02217  |
| N  | 17.00799  | -1.29768 | 0.90454  |
| C  | 17.70851  | -1.32869 | -0.20488 |
| N  | 18.65107  | -0.34860 | -0.21516 |
| H  | 17.60225  | -1.59237 | 4.95049  |
| H  | 18.99204  | 0.74028  | 3.61523  |
| H  | 16.16378  | -0.38066 | 3.33075  |
| H  | 16.64564  | 1.22905  | 2.72352  |
| H  | 19.13835  | 1.14794  | 1.36419  |
| H  | 17.47679  | -1.89380 | -1.10707 |
| H  | 19.16074  | 0.06878  | -0.96818 |
| Cu | 15.25733  | -5.51321 | -0.49626 |
| C  | -7.40675  | -3.22824 | -3.73560 |
| C  | -11.82990 | 4.61306  | -0.08566 |
| C  | -12.27899 | -0.90670 | 5.63689  |
| C  | -8.35725  | -5.96057 | 1.01707  |
| N  | -9.53367  | -1.23470 | -1.38101 |
| C  | -5.99925  | -2.73465 | -3.39408 |
| C  | -11.94338 | 5.60926  | -0.90230 |
| C  | -12.78931 | -0.35703 | 6.75708  |
| C  | -8.71946  | -6.69847 | -0.32684 |
| N  | -10.58757 | 1.11070  | -0.27748 |
| C  | -4.75414  | -3.55973 | -3.82898 |
| C  | -9.38434  | -8.06583 | 0.02140  |
| N  | -9.82673  | -2.49833 | 1.08975  |
| C  | -8.64416  | -3.44388 | -0.75741 |
| C  | -9.84106  | 0.78403  | -2.54671 |
| C  | -11.54212 | 2.11083  | 1.76622  |
| C  | -10.99160 | -2.40557 | 3.27432  |
| C  | -8.85264  | -0.84527 | -5.00040 |
| C  | -10.73709 | 3.58127  | -2.89765 |
| C  | -12.26688 | 2.07209  | 4.68360  |
| C  | -9.83404  | -5.22502 | 3.70656  |
| C  | -8.81326  | -2.37913 | -1.67409 |
| C  | -10.40944 | 1.54756  | -1.53558 |
| C  | -11.50906 | 0.94090  | 2.55550  |
| C  | -10.22671 | -3.02586 | 2.32207  |
| O  | -4.48031  | -3.72507 | -4.99116 |
| O  | -10.54075 | -8.15907 | -0.41325 |
| C  | -8.42811  | -2.35890 | -3.06988 |
| C  | -10.79304 | 2.88307  | -1.64766 |
| C  | -11.99255 | 0.88673  | 3.89673  |
| C  | -9.73825  | -4.31821 | 2.52439  |
| O  | -4.08474  | -4.04296 | -2.88188 |
| O  | -8.71031  | -8.95870 | 0.57724  |
| C  | -8.97435  | -1.26698 | -3.60235 |
| C  | -11.31226 | 3.36718  | -0.47248 |
| C  | -11.97632 | -0.34159 | 4.41544  |
| C  | -9.00161  | -4.64665 | 1.35902  |
| C  | -9.54948  | -0.56404 | -2.47904 |
| C  | -11.15808 | 2.19762  | 0.37867  |
| C  | -11.40185 | -1.07116 | 3.24027  |

|    |           |          |          |
|----|-----------|----------|----------|
| C  | -9.11891  | -3.48957 | 0.54079  |
| N  | -11.08620 | -0.28639 | 2.13914  |
| Fe | -10.24653 | -0.73140 | 0.37678  |
| H  | 10.29041  | -0.73286 | -2.11771 |
| H  | 7.60559   | -0.04945 | 2.30999  |
| H  | 4.91905   | -0.48052 | 1.53312  |
| H  | 1.91777   | 0.14876  | 3.38988  |
| H  | 1.24987   | -1.78804 | -2.00717 |
| H  | -4.62733  | 7.02792  | 1.33357  |
| H  | -2.99558  | 8.56682  | 0.46313  |
| H  | 1.28751   | 5.74334  | -0.15656 |
| H  | -1.00527  | 5.80064  | 3.22199  |
| H  | 18.75942  | -1.61855 | 3.81304  |
| H  | 17.73250  | 2.18320  | 4.88388  |
| H  | 17.77189  | 0.81703  | 6.03547  |
| H  | 15.88630  | 1.42272  | 4.23140  |
| H  | -7.52169  | -4.23636 | -3.39440 |
| H  | -7.54643  | -3.18700 | -4.79513 |
| H  | -12.13298 | 4.73910  | 0.89272  |
| H  | -12.08186 | -1.91752 | 5.70399  |
| H  | -7.30110  | -5.78883 | 0.99876  |
| H  | -8.74016  | -6.62018 | 1.76714  |
| H  | -5.89699  | -1.76606 | -3.83628 |
| H  | -5.97136  | -2.79567 | -2.32584 |
| H  | -11.64726 | 5.50688  | -1.88579 |
| H  | -12.33060 | 6.50663  | -0.57071 |
| H  | -13.01647 | 0.64955  | 6.78066  |
| H  | -12.95198 | -0.94259 | 7.59161  |
| H  | -9.40144  | -6.09978 | -0.89444 |
| H  | -7.83425  | -6.85905 | -0.90649 |
| H  | -8.11598  | -4.26544 | -1.09002 |
| H  | -9.61624  | 1.26865  | -3.42987 |
| H  | -11.86902 | 2.97790  | 2.22075  |
| H  | -11.28940 | -2.97163 | 4.08476  |
| H  | -8.37178  | -1.61641 | -5.56555 |
| H  | -8.27085  | 0.05139  | -5.05303 |
| H  | -9.82667  | -0.66219 | -5.40346 |
| H  | -10.27913 | 2.95538  | -3.63542 |
| H  | -10.16103 | 4.47567  | -2.78131 |
| H  | -11.72906 | 3.83382  | -3.21025 |
| H  | -12.61812 | 1.78367  | 5.65273  |
| H  | -13.01491 | 2.66027  | 4.19300  |
| H  | -11.37086 | 2.64755  | 4.78626  |
| H  | -9.33440  | -6.14617 | 3.49120  |
| H  | -10.86322 | -5.42026 | 3.92419  |
| H  | -9.37385  | -4.75842 | 4.55209  |
| H  | -5.01490  | -3.34092 | -5.65757 |
| H  | -10.95083 | -7.41885 | -0.81449 |

### Geometry of Pathway ET9

|   |          |          |          |
|---|----------|----------|----------|
| N | 10.24320 | -5.33118 | -0.20753 |
| C | 10.85906 | -4.06644 | 0.16146  |
| C | 10.43785 | -3.01534 | -0.89185 |
| O | 10.57501 | -3.16522 | -2.08676 |
| C | 12.42777 | -4.26468 | 0.32682  |
| C | 13.08733 | -2.89451 | 0.65253  |
| N | 14.14466 | -2.62230 | -0.13293 |
| O | 12.59920 | -2.07850 | 1.41756  |
| H | 10.79116 | -6.05044 | -0.61864 |
| H | 10.43434 | -3.82326 | 1.12462  |
| H | 12.55606 | -4.93535 | 1.20246  |
| H | 12.86257 | -4.65335 | -0.61552 |
| H | 14.55984 | -3.34021 | -0.68641 |

|   |          |          |          |
|---|----------|----------|----------|
| H | 14.34861 | -1.65501 | -0.21144 |
| N | 10.00521 | -1.79864 | -0.37006 |
| C | 9.40120  | -0.75737 | -1.26913 |
| C | 10.25282 | 0.44354  | -1.14802 |
| O | 9.93687  | 1.54112  | -1.64440 |
| C | 7.89391  | -0.36900 | -0.97158 |
| C | 6.93358  | -1.59555 | -0.95994 |
| C | 6.69283  | -2.14564 | -2.39550 |
| N | 5.68455  | -3.26415 | -2.32617 |
| C | 5.06127  | -3.72635 | -3.41396 |
| N | 5.54100  | -3.38313 | -4.60973 |
| N | 3.86083  | -4.25583 | -3.31437 |
| H | 10.02724 | -1.63299 | 0.60348  |
| H | 9.46892  | -1.09112 | -2.29354 |
| H | 7.89848  | 0.10735  | 0.02961  |
| H | 7.66427  | 0.29890  | -1.82227 |
| H | 7.21541  | -2.39688 | -0.24067 |
| H | 5.99101  | -1.09414 | -0.66472 |
| H | 6.41528  | -1.38713 | -3.16623 |
| H | 7.63534  | -2.62091 | -2.72413 |
| H | 4.99744  | -3.17553 | -1.60020 |
| H | 6.31094  | -2.79021 | -4.81155 |
| H | 4.92950  | -3.40887 | -5.40093 |
| H | 3.44223  | -4.04320 | -2.43798 |
| H | 3.32029  | -4.15755 | -4.15232 |
| N | 17.73121 | -1.09654 | 1.97037  |
| C | 17.11912 | -2.43595 | 2.15347  |
| C | 16.32761 | -2.82414 | 3.36847  |
| O | 16.43830 | -2.22953 | 4.45303  |
| C | 18.33820 | -3.42209 | 2.09800  |
| C | 19.21452 | -2.73040 | 1.01259  |
| C | 19.03068 | -1.25228 | 1.34345  |
| H | 16.53769 | -2.63160 | 1.26518  |
| H | 18.82918 | -3.33235 | 3.09213  |
| H | 18.05864 | -4.46965 | 1.84448  |
| H | 20.22902 | -3.16734 | 1.10887  |
| H | 18.88936 | -3.06151 | -0.00009 |
| H | 19.78805 | -1.08471 | 2.13762  |
| H | 19.25247 | -0.50282 | 0.55577  |
| N | 3.24838  | 5.78576  | 1.59874  |
| C | 3.17139  | 4.65482  | 0.73194  |
| C | 1.76943  | 4.24899  | 0.51563  |
| O | 1.00853  | 4.22271  | 1.43015  |
| C | 3.99143  | 3.48431  | 1.36790  |
| C | 3.94282  | 2.29829  | 0.45796  |
| C | 4.78298  | 2.29688  | -0.70284 |
| C | 3.05410  | 1.28436  | 0.67175  |
| C | 4.70092  | 1.15770  | -1.56709 |
| C | 2.95434  | 0.19298  | -0.19099 |
| C | 3.74316  | 0.17653  | -1.34550 |
| O | 3.61285  | -0.90327 | -2.27095 |
| H | 2.70842  | 5.68475  | 2.43644  |
| H | 3.58813  | 4.82356  | -0.25008 |
| H | 5.03534  | 3.87053  | 1.31811  |
| H | 3.69954  | 3.16788  | 2.39575  |
| H | 5.51416  | 3.03298  | -0.99008 |
| H | 2.29292  | 1.38008  | 1.43034  |
| H | 5.30017  | 1.05864  | -2.46269 |
| H | 2.23166  | -0.60262 | -0.04009 |
| H | 3.56421  | -1.66568 | -1.69124 |
| N | 1.36639  | 3.99363  | -0.76087 |
| C | 0.03145  | 3.80931  | -1.10925 |
| C | 0.19291  | 3.01918  | -2.28442 |
| O | 1.17596  | 3.01815  | -3.04113 |

|    |           |          |          |
|----|-----------|----------|----------|
| C  | -0.55680  | 5.17212  | -1.60413 |
| C  | -0.55149  | 6.25778  | -0.47635 |
| C  | -1.38606  | 6.44049  | 0.57489  |
| C  | 0.37639   | 7.32172  | -0.48948 |
| C  | 0.00941   | 8.14759  | 0.58832  |
| C  | 1.50665   | 7.66919  | -1.27903 |
| N  | -1.11064  | 7.62579  | 1.18759  |
| C  | 0.69591   | 9.29959  | 0.85102  |
| C  | 2.09669   | 8.91381  | -1.10530 |
| C  | 1.69091   | 9.71219  | -0.07588 |
| H  | 2.08144   | 3.83011  | -1.43775 |
| H  | -0.57722  | 3.43697  | -0.30415 |
| H  | 0.01776   | 5.67605  | -2.40496 |
| H  | -1.61842  | 5.04523  | -1.89009 |
| H  | -2.19839  | 5.76942  | 0.83237  |
| H  | -1.77309  | 8.03716  | 1.78896  |
| H  | 1.59225   | 7.02112  | -2.14539 |
| H  | 0.44106   | 9.90400  | 1.71046  |
| H  | 2.72568   | 9.30166  | -1.89829 |
| H  | 2.24568   | 10.63865 | 0.01956  |
| N  | -0.88200  | 2.30414  | -2.65346 |
| C  | -0.92844  | 1.38187  | -3.80596 |
| C  | -0.93397  | 2.21742  | -5.08253 |
| O  | -0.54129  | 1.84015  | -6.15054 |
| C  | -2.29133  | 0.68471  | -3.74750 |
| C  | -2.53237  | -0.32239 | -4.89421 |
| O  | -2.44960  | -0.14029 | -2.60604 |
| H  | -1.58390  | 2.20850  | -1.96390 |
| H  | -0.05600  | 0.75790  | -3.69416 |
| H  | -3.14182  | 1.40015  | -3.71594 |
| H  | -2.74093  | 0.44257  | -1.88911 |
| H  | -2.58171  | 0.23975  | -5.84592 |
| H  | -1.63436  | -0.97760 | -4.95055 |
| H  | -3.48051  | -0.89586 | -4.74867 |
| Cu | 15.49161  | 0.01473  | 5.42957  |
| C  | -6.44352  | 2.08501  | -1.19904 |
| C  | -13.42719 | 0.36232  | 5.33036  |
| C  | -12.06847 | -6.64937 | 1.80801  |
| C  | -6.50406  | -3.28310 | -2.66076 |
| N  | -9.19572  | 0.20358  | 0.51203  |
| C  | -5.30748  | 1.99232  | -0.17820 |
| C  | -13.86034 | 1.40597  | 5.95916  |
| C  | -12.76861 | -7.61494 | 2.43641  |
| C  | -6.54908  | -2.21692 | -3.81965 |
| N  | -11.03293 | -0.30338 | 2.56069  |
| C  | -3.84120  | 2.27934  | -0.61162 |
| C  | -6.70234  | -2.96718 | -5.17855 |
| N  | -9.09379  | -2.53033 | -0.03810 |
| C  | -7.60622  | -0.92377 | -0.99235 |
| C  | -10.15901 | 1.84295  | 1.89519  |
| C  | -12.33134 | -2.06740 | 3.69667  |
| C  | -10.27532 | -4.68872 | 0.25040  |
| C  | -8.59772  | 3.83427  | 0.09263  |
| C  | -11.96772 | 2.86588  | 4.00060  |
| C  | -13.07430 | -4.93284 | 4.22128  |
| C  | -8.21612  | -5.77660 | -1.76263 |
| C  | -8.11276  | 0.23031  | -0.34884 |
| C  | -10.98545 | 1.03534  | 2.66536  |
| C  | -11.91197 | -3.13730 | 2.87676  |
| C  | -9.31657  | -3.88485 | -0.30745 |
| O  | -3.49590  | 3.37119  | -0.98795 |
| O  | -7.74093  | -2.65918 | -5.77970 |
| C  | -7.72194  | 1.60451  | -0.58514 |
| C  | -11.80910 | 1.47367  | 3.70110  |

|    |           |          |          |
|----|-----------|----------|----------|
| C  | -12.38153 | -4.47539 | 3.03372  |
| C  | -8.41226  | -4.39060 | -1.24346 |
| O  | -3.07054  | 1.28876  | -0.55306 |
| O  | -5.77353  | -3.69166 | -5.59441 |
| C  | -8.60139  | 2.36931  | 0.05971  |
| C  | -12.49610 | 0.43704  | 4.28285  |
| C  | -11.95025 | -5.30231 | 2.08068  |
| C  | -7.57643  | -3.30571 | -1.60814 |
| C  | -9.41595  | 1.43720  | 0.80426  |
| C  | -11.96508 | -0.68334 | 3.52201  |
| C  | -11.12562 | -4.32758 | 1.29762  |
| C  | -8.06942  | -2.21761 | -0.83671 |
| N  | -11.07533 | -3.03614 | 1.80522  |
| Fe | -10.08629 | -1.40163 | 1.20591  |
| H  | 9.83798   | -5.72104 | 0.64365  |
| H  | 11.14390  | 0.36984  | -0.63263 |
| H  | 17.13106  | -0.52463 | 1.37562  |
| H  | 15.66767  | -3.61444 | 3.29984  |
| H  | 2.90926   | 6.60433  | 1.09238  |
| H  | -1.30329  | 3.17862  | -5.02202 |
| H  | -6.20741  | 1.47815  | -2.04868 |
| H  | -6.56048  | 3.10356  | -1.50353 |
| H  | -13.78121 | -0.56568 | 5.61045  |
| H  | -11.53188 | -6.97091 | 0.98716  |
| H  | -5.57474  | -3.14228 | -2.14908 |
| H  | -6.65176  | -4.20865 | -3.17639 |
| H  | -5.53894  | 2.68465  | 0.60363  |
| H  | -5.28852  | 0.95193  | 0.07255  |
| H  | -13.52097 | 2.34472  | 5.69649  |
| H  | -14.54585 | 1.30022  | 6.72339  |
| H  | -13.33427 | -7.38382 | 3.26827  |
| H  | -12.73826 | -8.58563 | 2.08626  |
| H  | -7.38205  | -1.56075 | -3.67379 |
| H  | -5.64851  | -1.63867 | -3.82040 |
| H  | -6.81521  | -0.78638 | -1.64043 |
| H  | -10.09454 | 2.83779  | 2.16261  |
| H  | -12.95306 | -2.29497 | 4.48847  |
| H  | -10.37767 | -5.64091 | -0.13532 |
| H  | -7.86246  | 4.20509  | -0.59087 |
| H  | -8.36538  | 4.16812  | 1.08248  |
| H  | -9.56308  | 4.19946  | -0.18916 |
| H  | -11.30014 | 3.43984  | 3.39177  |
| H  | -11.74447 | 3.03641  | 5.03327  |
| H  | -12.97662 | 3.16153  | 3.80005  |
| H  | -13.32811 | -5.96679 | 4.11034  |
| H  | -13.96750 | -4.35827 | 4.35638  |
| H  | -12.43946 | -4.81147 | 5.07380  |
| H  | -7.42011  | -5.78067 | -2.47740 |
| H  | -9.11728  | -6.11321 | -2.23092 |
| H  | -7.97110  | -6.42981 | -0.95164 |
| H  | -4.11314  | 4.07541  | -1.01138 |
| H  | -8.37329  | -2.10493 | -5.36737 |

#### Geometry of Pathway ET10

|   |          |         |          |
|---|----------|---------|----------|
| N | -0.57411 | 6.55764 | 1.42944  |
| C | -0.05101 | 6.46206 | 0.04173  |
| C | 0.25350  | 7.80752 | -0.39316 |
| O | -0.44644 | 8.74609 | -0.18515 |
| C | -1.18532 | 5.87778 | -0.96526 |
| C | -1.44602 | 4.37994 | -1.01643 |
| C | -0.19542 | 3.53703 | -1.25643 |
| C | -2.11271 | 3.90044 | 0.19361  |
| H | -1.55360 | 6.75566 | 1.48500  |

|   |          |          |          |
|---|----------|----------|----------|
| H | 0.87088  | 5.90627  | -0.07453 |
| H | -2.09188 | 6.45649  | -0.70709 |
| H | -0.82622 | 6.12777  | -1.98871 |
| H | -2.12746 | 4.19789  | -1.87170 |
| H | 0.36301  | 3.83835  | -2.16526 |
| H | 0.47397  | 3.83027  | -0.41077 |
| H | -0.35527 | 2.44391  | -1.37190 |
| H | -2.99964 | 4.51635  | 0.47254  |
| H | -2.50321 | 2.86342  | 0.14262  |
| H | -1.34865 | 3.97211  | 1.00000  |
| N | 1.45237  | 8.02047  | -1.02645 |
| C | 1.97382  | 9.34368  | -1.42906 |
| C | 1.99308  | 9.30760  | -2.89030 |
| O | 2.69705  | 8.50963  | -3.47449 |
| C | 3.32900  | 9.85275  | -0.79950 |
| C | 3.32636  | 9.90129  | 0.75377  |
| C | 2.36878  | 9.74273  | 1.69254  |
| N | 4.47946  | 10.26232 | 1.32902  |
| C | 4.30293  | 10.22857 | 2.60644  |
| N | 3.03708  | 9.84023  | 2.86590  |
| H | 2.09636  | 7.34048  | -1.34629 |
| H | 1.24542  | 10.10713 | -1.20307 |
| H | 4.05087  | 9.03623  | -0.99648 |
| H | 3.53274  | 10.83955 | -1.27196 |
| H | 1.35416  | 9.37146  | 1.62613  |
| H | 4.92708  | 10.59979 | 3.42254  |
| H | 2.66445  | 9.52659  | 3.73197  |
| N | -6.23729 | 5.15334  | -8.07105 |
| C | -5.90343 | 4.20318  | -7.06929 |
| C | -6.85149 | 2.98399  | -7.26875 |
| O | -8.06171 | 3.03124  | -7.60642 |
| C | -5.99633 | 4.76103  | -5.58714 |
| C | -5.78018 | 3.76899  | -4.49542 |
| C | -4.99606 | 5.93335  | -5.51681 |
| H | -6.92504 | 5.78281  | -7.73973 |
| H | -4.86104 | 3.93350  | -7.20040 |
| H | -6.96056 | 5.29360  | -5.44705 |
| H | -5.84702 | 4.21025  | -3.47924 |
| H | -6.46468 | 2.90222  | -4.62176 |
| H | -4.76634 | 3.36631  | -4.69357 |
| H | -5.20026 | 6.41752  | -4.53922 |
| H | -3.94500 | 5.59575  | -5.53924 |
| H | -5.28864 | 6.67717  | -6.29381 |
| N | -7.98876 | -0.59315 | -5.18821 |
| C | -7.95561 | -1.36245 | -4.05774 |
| C | -8.34947 | -2.76099 | -4.35366 |
| O | -9.09547 | -2.89435 | -5.29297 |
| C | -8.92434 | -0.90143 | -2.90850 |
| C | -8.52332 | 0.42346  | -2.25617 |
| C | -7.79049 | 0.59427  | -1.10657 |
| C | -8.75896 | 1.76650  | -2.69642 |
| C | -8.12862 | 2.64202  | -1.79756 |
| C | -9.33217 | 2.18795  | -3.85396 |
| N | -7.51070 | 1.83568  | -0.83071 |
| C | -8.15206 | 3.97050  | -1.95468 |
| C | -9.47998 | 3.61942  | -4.00582 |
| C | -8.85279 | 4.46623  | -3.01884 |
| H | -8.87478 | -0.57345 | -5.64808 |
| H | -6.90772 | -1.39159 | -3.80621 |
| H | -9.96623 | -0.82280 | -3.30256 |
| H | -8.80598 | -1.60018 | -2.05725 |
| H | -7.51089 | -0.27726 | -0.53162 |
| H | -7.14289 | 2.18460  | 0.00755  |
| H | -9.89704 | 1.50264  | -4.47634 |

|   |           |          |          |
|---|-----------|----------|----------|
| H | -7.55054  | 4.60364  | -1.32642 |
| H | -9.86257  | 3.99205  | -4.94777 |
| H | -8.94214  | 5.53830  | -3.13586 |
| N | -14.22633 | -6.68001 | 1.75006  |
| C | -13.89024 | -5.30605 | 2.18797  |
| C | -14.42229 | -4.38781 | 1.11766  |
| O | -14.59872 | -4.77906 | -0.01349 |
| C | -12.31202 | -5.12845 | 2.26140  |
| C | -11.57559 | -5.77998 | 3.45538  |
| C | -10.45724 | -6.57474 | 3.48051  |
| N | -11.97823 | -5.54581 | 4.69282  |
| C | -11.06974 | -6.03326 | 5.48796  |
| N | -10.13037 | -6.71366 | 4.80296  |
| H | -14.29323 | -6.85644 | 0.77109  |
| H | -14.40361 | -5.02829 | 3.09069  |
| H | -11.92135 | -5.61741 | 1.33771  |
| H | -11.89444 | -4.09943 | 2.31075  |
| H | -9.89639  | -6.92551 | 2.62040  |
| H | -11.11756 | -5.84013 | 6.56472  |
| H | -9.43383  | -7.29235 | 5.22493  |
| N | -14.41571 | -3.07536 | 1.41369  |
| C | -14.77916 | -1.98256 | 0.56965  |
| C | -14.06483 | -0.74427 | 1.08584  |
| O | -13.63181 | -0.63839 | 2.23536  |
| C | -16.20853 | -1.56865 | 0.19150  |
| C | -16.95544 | -0.79644 | 1.29115  |
| N | -18.01301 | -0.01999 | 0.89457  |
| O | -16.68492 | -0.87828 | 2.50194  |
| H | -14.16953 | -2.72862 | 2.32745  |
| H | -14.25146 | -2.13085 | -0.36187 |
| H | -16.23464 | -0.94459 | -0.72390 |
| H | -16.71549 | -2.48167 | -0.19318 |
| H | -18.13916 | 0.02950  | -0.09124 |
| H | -18.47136 | 0.42132  | 1.66416  |
| N | -13.81807 | 0.25999  | 0.26203  |
| C | -13.48963 | 1.59532  | 0.76198  |
| C | -14.74184 | 2.52896  | 0.89870  |
| O | -15.88484 | 2.36302  | 0.39302  |
| C | -12.40125 | 2.31891  | -0.16172 |
| C | -11.12902 | 1.63725  | 0.14631  |
| C | -12.77333 | 2.19867  | -1.69954 |
| H | -14.11855 | 0.16098  | -0.68307 |
| H | -13.02147 | 1.63001  | 1.74092  |
| H | -12.35023 | 3.38609  | 0.11275  |
| H | -10.41539 | 2.12108  | -0.55228 |
| H | -10.74985 | 1.96891  | 1.13481  |
| H | -11.09548 | 0.52439  | 0.02792  |
| H | -13.68830 | 2.76003  | -1.98518 |
| H | -11.96046 | 2.58457  | -2.35499 |
| H | -13.05287 | 1.15478  | -1.95872 |
| N | 10.48976  | 1.70957  | 5.57946  |
| C | 9.43385   | 1.02616  | 4.88793  |
| C | 8.37859   | 0.49157  | 5.80288  |
| O | 7.21168   | 0.57749  | 5.50432  |
| C | 9.96256   | -0.07103 | 3.96514  |
| S | 11.16862  | 0.54692  | 2.81608  |
| H | 11.28288  | 1.15036  | 5.79336  |
| H | 9.03431   | 1.78320  | 4.23170  |
| H | 10.38041  | -0.92793 | 4.55661  |
| H | 9.10334   | -0.40439 | 3.35154  |
| H | 12.00419  | -0.42269 | 3.17131  |
| N | 4.39484   | 1.73931  | 6.49910  |
| C | 4.74328   | 3.08489  | 6.30184  |
| C | 4.98264   | 3.32478  | 4.81239  |

|    |           |          |          |
|----|-----------|----------|----------|
| O  | 4.02110   | 3.61192  | 4.11806  |
| C  | 5.90282   | 3.55437  | 7.18725  |
| C  | 6.07505   | 5.04942  | 7.25477  |
| C  | 7.25686   | 5.52688  | 8.22527  |
| C  | 7.29422   | 7.06548  | 8.41449  |
| N  | 7.81452   | 7.87135  | 7.22040  |
| H  | 4.62721   | 1.09848  | 5.77560  |
| H  | 3.89667   | 3.68090  | 6.61204  |
| H  | 5.68588   | 3.27931  | 8.24165  |
| H  | 6.80020   | 2.95182  | 6.89375  |
| H  | 6.29542   | 5.42873  | 6.23670  |
| H  | 5.15835   | 5.62268  | 7.49378  |
| H  | 7.13677   | 5.11114  | 9.24754  |
| H  | 8.22294   | 5.12165  | 7.86006  |
| H  | 6.30255   | 7.51825  | 8.61272  |
| H  | 7.98210   | 7.37653  | 9.23484  |
| H  | 7.12326   | 7.83927  | 6.44766  |
| H  | 8.01750   | 8.88547  | 7.33552  |
| H  | 8.67439   | 7.46530  | 6.81254  |
| Cu | -13.39545 | -8.08298 | 5.85837  |
| C  | 8.68767   | -8.13289 | -0.59977 |
| C  | 14.42686  | -0.93528 | 2.50323  |
| C  | 11.45297  | 1.59300  | -4.43801 |
| C  | 7.37512   | -5.13026 | -5.09624 |
| N  | 10.68174  | -4.96619 | -0.79417 |
| C  | 7.49811   | -7.71139 | 0.26544  |
| C  | 15.08315  | -1.18574 | 3.58893  |
| C  | 11.81195  | 2.87601  | -4.64392 |
| C  | 7.79712   | -6.63060 | -5.32580 |
| N  | 12.15241  | -2.82368 | 0.24325  |
| C  | 6.20358   | -8.57385 | 0.28890  |
| C  | 7.83743   | -6.90551 | -6.86066 |
| N  | 9.87172   | -3.34808 | -2.91852 |
| C  | 8.95845   | -5.50822 | -2.46660 |
| C  | 11.95471  | -5.03592 | 1.18151  |
| C  | 12.82764  | -0.48237 | -0.14456 |
| C  | 10.38869  | -1.28665 | -4.19177 |
| C  | 11.13914  | -8.03336 | 1.23034  |
| C  | 13.81515  | -3.98017 | 3.22473  |
| C  | 12.71216  | 2.13101  | -1.62606 |
| C  | 8.26347   | -2.30113 | -6.17429 |
| C  | 9.71441   | -5.81092 | -1.30924 |
| C  | 12.46782  | -3.74559 | 1.16845  |
| C  | 12.19139  | -0.33036 | -1.39551 |
| C  | 9.73211   | -2.47381 | -4.00160 |
| O  | 6.20094   | -9.69756 | 0.72510  |
| O  | 8.96198   | -7.24308 | -7.25604 |
| C  | 9.73558   | -7.06345 | -0.58280 |
| C  | 13.30179  | -3.19598 | 2.14093  |
| C  | 12.26147  | 0.86586  | -2.16993 |
| C  | 8.79491   | -2.93186 | -4.92980 |
| O  | 5.18781   | -8.01345 | -0.19356 |
| O  | 6.77825   | -6.88068 | -7.52249 |
| C  | 10.74170  | -6.98525 | 0.28657  |
| C  | 13.63204  | -1.89412 | 1.85617  |
| C  | 11.69051  | 0.75326  | -3.36969 |
| C  | 8.31932   | -4.16971 | -4.42967 |
| C  | 11.21102  | -5.62346 | 0.17721  |
| C  | 12.87053  | -1.69668 | 0.63255  |
| C  | 11.22610  | -0.66661 | -3.26205 |
| C  | 9.03471   | -4.34672 | -3.21353 |
| N  | 11.49616  | -1.29934 | -2.05592 |
| Fe | 11.04231  | -3.12617 | -1.37350 |
